# Supplementary material for: Systematic Review and Meta-analysis of Short- versus Long-Acting Granulocyte Colony-Stimulating Factors for Reduction of Chemotherapy-Induced Febrile Neutropenia
Source: PubMed Central journal article supplement — Adv Ther. 2018 Oct 8;35(11):1816–29. doi: 10.1007/s12325-018-0798-6 (PMC6223993; doi:10.1007/s12325-018-0798-6), 2018-10-08
Supplement: 12325_2018_798_MOESM1_ESM.pdf [file 12325_2018_798_MOESM1_ESM.pdf]

**Supplementary Appendix Table S1** Electronic searches performed in August 2015

| Database,<br>search no. | Search string                                                                                                                                                                                                                                                                                    | Results |
|-------------------------|--------------------------------------------------------------------------------------------------------------------------------------------------------------------------------------------------------------------------------------------------------------------------------------------------|---------|
| <b>Embase</b>           |                                                                                                                                                                                                                                                                                                  |         |
| 1                       | Granulocyte colony stimulating factor.mp. or exp granulocyte colony stimulating factor/                                                                                                                                                                                                          | 48246   |
| 2                       | (G-CSF\$ or GCSF).mp. [mp=title, abstract, heading word, drug trade name, original title, device manufacturer, drug manufacturer, device trade name, keyword]                                                                                                                                    | 20300   |
| 3                       | filgrastim.mp. or exp filgrastim/                                                                                                                                                                                                                                                                | 3920    |
| 4                       | (Neupogen or Zarzio or Nivestim or Ratiograstim).mp. [mp=title, abstract, heading word, drug trade name, original title, device manufacturer, drug manufacturer, device trade name, keyword]                                                                                                     | 2413    |
| 5                       | Lenograstim.mp. or exp lenograstim/                                                                                                                                                                                                                                                              | 828     |
| 6                       | Granocyte.mp.                                                                                                                                                                                                                                                                                    | 319     |
| 7                       | lipegfilgrastim.mp. or exp lipegfilgrastim/                                                                                                                                                                                                                                                      | 44      |
| 8                       | Pegfilgrastim.mp. or exp pegfilgrastim/                                                                                                                                                                                                                                                          | 1177    |
| 9                       | Neulasta.mp.                                                                                                                                                                                                                                                                                     | 664     |
| 10                      | (Biograstim or Tevagrastim or Grastofil or Accofil).mp. [mp=title, abstract, heading word, drug trade name, original title, device manufacturer, drug manufacturer, device trade name, keyword]                                                                                                  | 115     |
| 11                      | (Euprotin or r-metHuG-CSF or SD-01 or PEG-rmetHuG-CSFor XM02).mp. [mp=title, abstract, heading word, drug trade name, original title, device manufacturer, drug manufacturer, device trade name, keyword]                                                                                        | 373     |
| 12                      | (Ro 25-8315m or Nartograstim or Empegfilgrastim or Maxy-G34 or BK0026 or Ro 25-8315m or Nartograstim or Empegfilgrastim or Maxy-G34 or PEG-rHuG-CSF).mp. [mp=title, abstract, heading word, drug trade name, original title, device manufacturer, drug manufacturer, device trade name, keyword] | 71      |
| 13                      | or/1-12                                                                                                                                                                                                                                                                                          | 50833   |
| 14                      | exp neutropenia/ or neutropenia.mp.                                                                                                                                                                                                                                                              | 91651   |
| 15                      | febrile neutropenia.mp. or exp Febrile Neutropenia/                                                                                                                                                                                                                                              | 22954   |
| 16                      | exp severe congenital neutropenia/ or severe congenital neutropenia.mp.                                                                                                                                                                                                                          | 732     |
| 17                      | leukopenia.mp. or exp leukopenia/                                                                                                                                                                                                                                                                | 155774  |
| 18                      | granulocyte disorder.mp.                                                                                                                                                                                                                                                                         | 4       |
| 19                      | or/14-18                                                                                                                                                                                                                                                                                         | 160655  |
| 20                      | (chemotherapy or cancer).mp. [mp=title, abstract, heading word, drug trade name, original title, device manufacturer, drug manufacturer, device trade name, keyword]                                                                                                                             | 2543716 |
| 21                      | 13 and 19                                                                                                                                                                                                                                                                                        | 16979   |
| 22                      | 20 and 21                                                                                                                                                                                                                                                                                        | 11105   |
| 23                      | Clinical study/                                                                                                                                                                                                                                                                                  | 113574  |
| 24                      | exp case control study/                                                                                                                                                                                                                                                                          | 104419  |
| 25                      | Longitudinal study/                                                                                                                                                                                                                                                                              | 80175   |
| 26                      | Retrospective study/                                                                                                                                                                                                                                                                             | 418189  |
| 27                      | Prospective study/                                                                                                                                                                                                                                                                               | 301921  |

G-CSFs for chemotherapy-induced febrile neutropenia

| Database, search no. | Search string                                                                                                                                                                                                                                                               | Results |
|----------------------|-----------------------------------------------------------------------------------------------------------------------------------------------------------------------------------------------------------------------------------------------------------------------------|---------|
| 28                   | Cohort analysis/                                                                                                                                                                                                                                                            | 211135  |
| 29                   | (Cohort adj (study or studies)).mp.                                                                                                                                                                                                                                         | 144428  |
| 30                   | (Case control adj (study or studies)).tw.                                                                                                                                                                                                                                   | 86719   |
| 31                   | (follow up adj (study or studies)).tw.                                                                                                                                                                                                                                      | 49735   |
| 32                   | (observational adj (study or studies)).tw.                                                                                                                                                                                                                                  | 79782   |
| 33                   | (epidemiologic\$ adj (study or studies)).tw.                                                                                                                                                                                                                                | 81479   |
| 34                   | (cross sectional adj (study or studies)).tw.                                                                                                                                                                                                                                | 105972  |
| 35                   | (random\$ or placebo\$ or single blind\$ or double blind\$ or triple blind\$).mp.<br>[mp=title, abstract, heading word, drug trade name, original title, device manufacturer, drug manufacturer, device trade name, keyword]                                                | 1369501 |
| 36                   | (random sampl\$ or random digit\$ or random effect\$ or random survey or random regression).ti,ab. not exp randomized controlled trial/                                                                                                                                     | 65527   |
| 37                   | 35 not 36                                                                                                                                                                                                                                                                   | 1303974 |
| 38                   | cost\$.mp. or exp "cost"/ or "health care cost"/ or "cost of illness"/                                                                                                                                                                                                      | 751451  |
| 39                   | or/23-34,37-38                                                                                                                                                                                                                                                              | 3222109 |
| 40                   | 22 and 39                                                                                                                                                                                                                                                                   | 3774    |
| 41                   | (animals not (humans and animals)).mp.                                                                                                                                                                                                                                      | 616345  |
| 42                   | 40 not 41                                                                                                                                                                                                                                                                   | 3765    |
| 43                   | limit 42 to yr="2003 -Current"                                                                                                                                                                                                                                              | 2932    |
| <b>Medline</b>       |                                                                                                                                                                                                                                                                             |         |
| 1                    | Granulocyte colony stimulating factor.mp. or exp Granulocyte Colony-Stimulating Factor/                                                                                                                                                                                     | 18150   |
| 2                    | (G-CSF\$ or GCSF).mp. [mp=title, abstract, original title, name of substance word, subject heading word, keyword heading word, protocol supplementary concept word, rare disease supplementary concept word, unique identifier]                                             | 13014   |
| 3                    | filgrastim.mp.                                                                                                                                                                                                                                                              | 2152    |
| 4                    | (Neupogen or Zarzio or Nivestim or Ratiograstim).mp. [mp=title, abstract, original title, name of substance word, subject heading word, keyword heading word, protocol supplementary concept word, rare disease supplementary concept word, unique identifier]              | 157     |
| 5                    | Lenograstim.mp.                                                                                                                                                                                                                                                             | 356     |
| 6                    | Granocyte.mp.                                                                                                                                                                                                                                                               | 19      |
| 7                    | lipegfilgrastim.mp.                                                                                                                                                                                                                                                         | 9       |
| 8                    | Pegfilgrastim.mp.                                                                                                                                                                                                                                                           | 550     |
| 9                    | Neulasta.mp.                                                                                                                                                                                                                                                                | 39      |
| 10                   | (Biograstim or Tevagrastim or Grastofil or Accofil).mp. [mp=title, abstract, original title, name of substance word, subject heading word, keyword heading word, protocol supplementary concept word, rare disease supplementary concept word, unique identifier]           | 7       |
| 11                   | (Euprotin or r-metHuG-CSF or SD-01 or PEG-rmetHuG-CSFor XM02).mp. [mp=title, abstract, original title, name of substance word, subject heading word, keyword heading word, protocol supplementary concept word, rare disease supplementary concept word, unique identifier] | 285     |
| 12                   | (Ro 25-8315m or Nartograstim or Empegfilgrastim or Maxy-G34 or BK0026 or                                                                                                                                                                                                    | 52      |

G-CSFs for chemotherapy-induced febrile neutropenia

| Database, search no. | Search string                                                                                                                                                                                                                                                                             | Results |
|----------------------|-------------------------------------------------------------------------------------------------------------------------------------------------------------------------------------------------------------------------------------------------------------------------------------------|---------|
|                      | Ro 25-8315m or Nartograstim or Empegfilgrastim or Maxy-G34 or PEG-rHuG-CSF).mp. [mp=title, abstract, original title, name of substance word, subject heading word, keyword heading word, protocol supplementary concept word, rare disease supplementary concept word, unique identifier] |         |
| 13                   | or/1-12                                                                                                                                                                                                                                                                                   | 21550   |
| 14                   | neutropenia.mp. or exp Neutropenia/                                                                                                                                                                                                                                                       | 33632   |
| 15                   | febrile neutropenia.mp. or exp Febrile Neutropenia/                                                                                                                                                                                                                                       | 4848    |
| 16                   | severe congenital neutropenia.mp.                                                                                                                                                                                                                                                         | 410     |
| 17                   | leukopenia.mp. or exp Leukopenia/                                                                                                                                                                                                                                                         | 40374   |
| 18                   | granulocyte disorder.mp.                                                                                                                                                                                                                                                                  | 3       |
| 19                   | or/14-18                                                                                                                                                                                                                                                                                  | 56101   |
| 20                   | 13 and 19                                                                                                                                                                                                                                                                                 | 5079    |
| 21                   | chemotherapy.mp. [mp=title, abstract, original title, name of substance word, subject heading word, keyword heading word, protocol supplementary concept word, rare disease supplementary concept word, unique identifier]                                                                | 329244  |
| 22                   | cancer.mp. [mp=title, abstract, original title, name of substance word, subject heading word, keyword heading word, protocol supplementary concept word, rare disease supplementary concept word, unique identifier]                                                                      | 1191481 |
| 23                   | 20 and (21 or 22)                                                                                                                                                                                                                                                                         | 2900    |
| 24                   | Clinical study.mp.                                                                                                                                                                                                                                                                        | 42651   |
| 25                   | case control study.mp. or exp Case-Control Studies/                                                                                                                                                                                                                                       | 753934  |
| 26                   | Longitudinal study.mp. or exp Longitudinal Studies/                                                                                                                                                                                                                                       | 110238  |
| 27                   | Retrospective study.mp. or exp Retrospective Studies/                                                                                                                                                                                                                                     | 570389  |
| 28                   | Prospective study.mp. or exp Prospective Studies/                                                                                                                                                                                                                                         | 431546  |
| 29                   | Cohort analysis.mp. or exp Cohort Studies/                                                                                                                                                                                                                                                | 1477414 |
| 30                   | (Cohort adj (study or studies)).mp. [mp=title, abstract, original title, name of substance word, subject heading word, keyword heading word, protocol supplementary concept word, rare disease supplementary concept word, unique identifier]                                             | 245602  |
| 31                   | (follow up adj (study or studies)).mp. [mp=title, abstract, original title, name of substance word, subject heading word, keyword heading word, protocol supplementary concept word, rare disease supplementary concept word, unique identifier]                                          | 549349  |
| 32                   | (observational adj (study or studies)).mp. [mp=title, abstract, original title, name of substance word, subject heading word, keyword heading word, protocol supplementary concept word, rare disease supplementary concept word, unique identifier]                                      | 64529   |
| 33                   | (epidemiologic\$ adj (study or studies)).mp. [mp=title, abstract, original title, name of substance word, subject heading word, keyword heading word, protocol supplementary concept word, rare disease supplementary concept word, unique identifier]                                    | 70715   |
| 34                   | (cross sectional adj (study or studies)).mp. [mp=title, abstract, original title, name of substance word, subject heading word, keyword heading word, protocol supplementary concept word, rare disease supplementary concept word, unique                                                | 228088  |

G-CSFs for chemotherapy-induced febrile neutropenia

| Database, search no. | Search string                                                                                                                                                                                                                                                                                             | Results |
|----------------------|-----------------------------------------------------------------------------------------------------------------------------------------------------------------------------------------------------------------------------------------------------------------------------------------------------------|---------|
|                      | identifier]                                                                                                                                                                                                                                                                                               |         |
| 35                   | (random\$ or placebo\$ or single blind\$ or double blind\$ or triple blind\$).mp. [mp=title, abstract, original title, name of substance word, subject heading word, keyword heading word, protocol supplementary concept word, rare disease supplementary concept word, unique identifier]               | 1074032 |
| 36                   | (random sampl\$ or random digit\$ or random effect\$ or random survey or random regression).mp. [mp=title, abstract, original title, name of substance word, subject heading word, keyword heading word, protocol supplementary concept word, rare disease supplementary concept word, unique identifier] | 56899   |
| 37                   | 35 not 36                                                                                                                                                                                                                                                                                                 | 1017133 |
| 38                   | cost*.ti.                                                                                                                                                                                                                                                                                                 | 89331   |
| 39                   | exp "Costs and Cost Analysis"/                                                                                                                                                                                                                                                                            | 192517  |
| 40                   | or/38-39                                                                                                                                                                                                                                                                                                  | 225514  |
| 41                   | or/24-34,37,40                                                                                                                                                                                                                                                                                            | 3024650 |
| 42                   | 41 and 23                                                                                                                                                                                                                                                                                                 | 1109    |
| 43                   | (animals not (humans and animals)).sh.                                                                                                                                                                                                                                                                    | 3998891 |
| 44                   | 42 not 43                                                                                                                                                                                                                                                                                                 | 1105    |
| 45                   | limit 44 to yr="2003 -Current"                                                                                                                                                                                                                                                                            | 615     |
| <b>Cochrane</b>      |                                                                                                                                                                                                                                                                                                           |         |
| 1                    | Granulocyte colony stimulating factor.mp. or exp Granulocyte Colony-Stimulating Factor/                                                                                                                                                                                                                   | 2284    |
| 2                    | (G-CSF\$ or GCSF).mp. [mp=ti, ab, tx, kw, ct, ot, sh, hw]                                                                                                                                                                                                                                                 | 1800    |
| 3                    | filgrastim.mp.                                                                                                                                                                                                                                                                                            | 660     |
| 4                    | (Neupogen or Zarzio or Nivestim or Ratiograstim).mp. [mp=ti, ab, tx, kw, ct, ot, sh, hw]                                                                                                                                                                                                                  | 47      |
| 5                    | Lenograstim.mp.                                                                                                                                                                                                                                                                                           | 205     |
| 6                    | Granocyte.mp.                                                                                                                                                                                                                                                                                             | 20      |
| 7                    | lipegfilgrastim.mp.                                                                                                                                                                                                                                                                                       | 6       |
| 8                    | Pegfilgrastim.mp.                                                                                                                                                                                                                                                                                         | 200     |
| 9                    | Neulasta.mp.                                                                                                                                                                                                                                                                                              | 15      |
| 10                   | (Biograstim or Tevagrastim or Grastofil or Accofil).mp. [mp=ti, ab, tx, kw, ct, ot, sh, hw]                                                                                                                                                                                                               | 4       |
| 11                   | (Euproton or r-metHuG-CSF or SD-01 or PEG-rmetHuG-CSFor XM02).mp. [mp=ti, ab, tx, kw, ct, ot, sh, hw]                                                                                                                                                                                                     | 108     |
| 12                   | (Ro 25-8315m or Nartograstim or Empegfilgrastim or Maxy-G34 or BK0026 or Ro 25-8315m or Nartograstim or Empegfilgrastim or Maxy-G34 or PEG-rHuG-CSF).mp. [mp=ti, ab, tx, kw, ct, ot, sh, hw]                                                                                                              | 8       |
| 13                   | or/1-12                                                                                                                                                                                                                                                                                                   | 3259    |
| 14                   | neutropenia.mp. or exp Neutropenia/                                                                                                                                                                                                                                                                       | 6414    |
| 15                   | febrile neutropenia.mp. or exp Febrile Neutropenia/                                                                                                                                                                                                                                                       | 1794    |
| 16                   | severe congenital neutropenia.mp.                                                                                                                                                                                                                                                                         | 3       |
| 17                   | leukopenia.mp. or exp Leukopenia/                                                                                                                                                                                                                                                                         | 4414    |
| 18                   | granulocyte disorder.mp.                                                                                                                                                                                                                                                                                  | 0       |
| 19                   | or/14-18                                                                                                                                                                                                                                                                                                  | 8571    |

G-CSFs for chemotherapy-induced febrile neutropenia

| Database,<br>search no. | Search string                                                                                                                          | Results |
|-------------------------|----------------------------------------------------------------------------------------------------------------------------------------|---------|
| 20                      | 13 and 19                                                                                                                              | 1075    |
| 21                      | chemotherapy.mp. [mp=ti, ab, tx, kw, ct, ot, sh, hw]                                                                                   | 36508   |
| 22                      | 20 and 21                                                                                                                              | 844     |
| 23                      | Clinical study.mp.                                                                                                                     | 74228   |
| 24                      | case control study.mp. or exp Case-Control Studies/                                                                                    | 12858   |
| 25                      | Longitudinal study.mp. or exp Longitudinal Studies/                                                                                    | 106088  |
| 26                      | Retrospective study.mp. or exp Retrospective Studies/                                                                                  | 9251    |
| 27                      | Prospective study.mp. or exp Prospective Studies/                                                                                      | 88739   |
| 28                      | Cohort analysis.mp. or exp Cohort Studies/                                                                                             | 114348  |
| 29                      | (Cohort adj (study or studies)).mp. [mp=ti, ab, tx, kw, ct, ot, sh, hw]                                                                | 14044   |
| 30                      | (follow up adj (study or studies)).mp. [mp=ti, ab, tx, kw, ct, ot, sh, hw]                                                             | 49473   |
| 31                      | (observational adj (study or studies)).mp. [mp=ti, ab, tx, kw, ct, ot, sh, hw]                                                         | 7880    |
| 32                      | (epidemiologic\$ adj (study or studies)).mp. [mp=ti, ab, tx, kw, ct, ot, sh, hw]                                                       | 2571    |
| 33                      | (cross sectional adj (study or studies)).mp. [mp=ti, ab, tx, kw, ct, ot, sh, hw]                                                       | 5239    |
| 34                      | (random\$ or placebo\$ or single blind\$ or double blind\$ or triple blind\$).mp.<br>[mp=ti, ab, tx, kw, ct, ot, sh, hw]               | 579730  |
| 35                      | (random sampl\$ or random digit\$ or random effect\$ or random survey or<br>random regression).mp. [mp=ti, ab, tx, kw, ct, ot, sh, hw] | 16483   |
| 36                      | 34 not 35                                                                                                                              | 563247  |
| 37                      | cost*.ti.                                                                                                                              | 19004   |
| 38                      | exp "Costs and Cost Analysis"/                                                                                                         | 23024   |
| 39                      | or/37-38                                                                                                                               | 28408   |
| 40                      | or/23-33,36,39                                                                                                                         | 626531  |
| 41                      | 22 and 40                                                                                                                              | 699     |
| 42                      | limit 41 to yr="2003 -Current" [Limit not valid in DARE; records were retained]                                                        | 423     |

**Supplementary Appendix Table S2** Electronic searches performed in June 2016

| Database,<br>search no. | Search string                                                                                                                                                                                                                                                                                    | Results |
|-------------------------|--------------------------------------------------------------------------------------------------------------------------------------------------------------------------------------------------------------------------------------------------------------------------------------------------|---------|
| <b>Embase</b>           |                                                                                                                                                                                                                                                                                                  |         |
| 1                       | Granulocyte colony stimulating factor.mp. or exp granulocyte colony stimulating factor/                                                                                                                                                                                                          | 50476   |
| 2                       | (G-CSF\$ or GCSF).mp. [mp=title, abstract, heading word, drug trade name, original title, device manufacturer, drug manufacturer, device trade name, keyword]                                                                                                                                    | 21580   |
| 3                       | filgrastim.mp. or exp filgrastim/                                                                                                                                                                                                                                                                | 4337    |
| 4                       | (Neupogen or Zarzio or Nivestim or Ratiograstim).mp. [mp=title, abstract, heading word, drug trade name, original title, device manufacturer, drug manufacturer, device trade name, keyword]                                                                                                     | 2486    |
| 5                       | Lenograstim.mp. or exp lenograstim/                                                                                                                                                                                                                                                              | 880     |
| 6                       | Granocyte.mp.                                                                                                                                                                                                                                                                                    | 323     |
| 7                       | lipegfilgrastim.mp. or exp lipegfilgrastim/                                                                                                                                                                                                                                                      | 71      |
| 8                       | Pegfilgrastim.mp. or exp pegfilgrastim/                                                                                                                                                                                                                                                          | 1391    |
| 9                       | Neulasta.mp.                                                                                                                                                                                                                                                                                     | 701     |
| 10                      | (Biograstim or Tevagrastim or Grastofil or Accofil).mp. [mp=title, abstract, heading word, drug trade name, original title, device manufacturer, drug manufacturer, device trade name, keyword]                                                                                                  | 130     |
| 11                      | (Euproton or r-metHuG-CSF or SD-01 or PEG-rmetHuG-CSFor XM02).mp. [mp=title, abstract, heading word, drug trade name, original title, device manufacturer, drug manufacturer, device trade name, keyword]                                                                                        | 402     |
| 12                      | (Ro 25-8315m or Nartograstim or Empegfilgrastim or Maxy-G34 or BK0026 or Ro 25-8315m or Nartograstim or Empegfilgrastim or Maxy-G34 or PEG-rHuG-CSF).mp. [mp=title, abstract, heading word, drug trade name, original title, device manufacturer, drug manufacturer, device trade name, keyword] | 74      |
| 13                      | or/1-12                                                                                                                                                                                                                                                                                          | 53564   |
| 14                      | exp neutropenia/ or neutropenia.mp.                                                                                                                                                                                                                                                              | 98006   |
| 15                      | febrile neutropenia.mp. or exp Febrile Neutropenia/                                                                                                                                                                                                                                              | 25070   |
| 16                      | exp severe congenital neutropenia/ or severe congenital neutropenia.mp.                                                                                                                                                                                                                          | 780     |
| 17                      | leukopenia.mp. or exp leukopenia/                                                                                                                                                                                                                                                                | 165669  |
| 18                      | granulocyte disorder.mp.                                                                                                                                                                                                                                                                         | 4       |
| 19                      | or/14-18                                                                                                                                                                                                                                                                                         | 170802  |
| 20                      | (chemotherapy or cancer).mp. [mp=title, abstract, heading word, drug trade name, original title, device manufacturer, drug manufacturer, device trade name, keyword]                                                                                                                             | 2737202 |
| 21                      | 13 and 19                                                                                                                                                                                                                                                                                        | 17820   |
| 22                      | 20 and 21                                                                                                                                                                                                                                                                                        | 11679   |
| 23                      | Clinical study/                                                                                                                                                                                                                                                                                  | 122799  |
| 24                      | exp case control study/                                                                                                                                                                                                                                                                          | 115589  |
| 25                      | Longitudinal study/                                                                                                                                                                                                                                                                              | 88464   |
| 26                      | Retrospective study/                                                                                                                                                                                                                                                                             | 469207  |
| 27                      | Prospective study/                                                                                                                                                                                                                                                                               | 337335  |

G-CSFs for chemotherapy-induced febrile neutropenia

| Database,<br>search no. | Search string                                                                                                                                                                                                                                                                        | Results |
|-------------------------|--------------------------------------------------------------------------------------------------------------------------------------------------------------------------------------------------------------------------------------------------------------------------------------|---------|
| 28                      | Cohort analysis/                                                                                                                                                                                                                                                                     | 246159  |
| 29                      | (Cohort adj (study or studies)).mp.                                                                                                                                                                                                                                                  | 167573  |
| 30                      | (Case control adj (study or studies)).tw.                                                                                                                                                                                                                                            | 94772   |
| 31                      | (follow up adj (study or studies)).tw.                                                                                                                                                                                                                                               | 52484   |
| 32                      | (observational adj (study or studies)).tw.                                                                                                                                                                                                                                           | 92126   |
| 33                      | (epidemiologic\$ adj (study or studies)).tw.                                                                                                                                                                                                                                         | 86321   |
| 34                      | (cross sectional adj (study or studies)).tw.                                                                                                                                                                                                                                         | 120048  |
| 35                      | (random\$ or placebo\$ or single blind\$ or double blind\$ or triple blind\$).mp.<br>[mp=title, abstract, heading word, drug trade name, original title, device<br>manufacturer, drug manufacturer, device trade name, keyword]                                                      | 1476018 |
| 36                      | (random sampl\$ or random digit\$ or random effect\$ or random survey or<br>random regression).ti,ab. not exp randomized controlled trial/                                                                                                                                           | 72686   |
| 37                      | 35 not 36                                                                                                                                                                                                                                                                            | 1403332 |
| 38                      | cost\$.mp. or exp "cost"/ or "health care cost"/ or "cost of illness"/                                                                                                                                                                                                               | 801013  |
| 39                      | or/23-34,37-38                                                                                                                                                                                                                                                                       | 3501223 |
| 40                      | 22 and 39                                                                                                                                                                                                                                                                            | 4048    |
| 41                      | (animals not (humans and animals)).mp.                                                                                                                                                                                                                                               | 644109  |
| 42                      | 40 not 41                                                                                                                                                                                                                                                                            | 4039    |
| 43                      | limit 42 to dd=20150501-20160530                                                                                                                                                                                                                                                     | 378     |
| <b>Medline</b>          |                                                                                                                                                                                                                                                                                      |         |
| 1                       | Granulocyte colony stimulating factor.mp. or exp Granulocyte Colony-<br>Stimulating Factor/                                                                                                                                                                                          | 18796   |
| 2                       | (G-CSF\$ or GCSF).mp. [mp=title, abstract, original title, name of substance<br>word, subject heading word, keyword heading word, protocol supplementary<br>concept word, rare disease supplementary concept word, unique identifier]                                                | 13609   |
| 3                       | filgrastim.mp.                                                                                                                                                                                                                                                                       | 2260    |
| 4                       | (Neupogen or Zarzio or Nivestim or Ratiograstim).mp. [mp=title, abstract,<br>original title, name of substance word, subject heading word, keyword heading<br>word, protocol supplementary concept word, rare disease supplementary<br>concept word, unique identifier]              | 183     |
| 5                       | Lenograstim.mp.                                                                                                                                                                                                                                                                      | 365     |
| 6                       | Granocyte.mp.                                                                                                                                                                                                                                                                        | 20      |
| 7                       | lipegfilgrastim.mp.                                                                                                                                                                                                                                                                  | 22      |
| 8                       | Pegfilgrastim.mp.                                                                                                                                                                                                                                                                    | 605     |
| 9                       | Neulasta.mp.                                                                                                                                                                                                                                                                         | 51      |
| 10                      | (Biograstim or Tevagrastim or Grastofil or Accofil).mp. [mp=title, abstract,<br>original title, name of substance word, subject heading word, keyword heading<br>word, protocol supplementary concept word, rare disease supplementary<br>concept word, unique identifier]           | 11      |
| 11                      | (Euproton or r-metHuG-CSF or SD-01 or PEG-rmetHuG-CSFor XM02).mp.<br>[mp=title, abstract, original title, name of substance word, subject heading<br>word, keyword heading word, protocol supplementary concept word, rare<br>disease supplementary concept word, unique identifier] | 298     |
| 12                      | (Ro 25-8315m or Nartograstim or Empegfilgrastim or Maxy-G34 or BK0026 or                                                                                                                                                                                                             | 51      |

G-CSFs for chemotherapy-induced febrile neutropenia

| Database,<br>search no. | Search string                                                                                                                                                                                                                                                                             | Results |
|-------------------------|-------------------------------------------------------------------------------------------------------------------------------------------------------------------------------------------------------------------------------------------------------------------------------------------|---------|
|                         | Ro 25-8315m or Nartograstim or Empegfilgrastim or Maxy-G34 or PEG-rHuG-CSF).mp. [mp=title, abstract, original title, name of substance word, subject heading word, keyword heading word, protocol supplementary concept word, rare disease supplementary concept word, unique identifier] |         |
| 13                      | or/1-12                                                                                                                                                                                                                                                                                   | 22438   |
| 14                      | neutropenia.mp. or exp Neutropenia/                                                                                                                                                                                                                                                       | 35117   |
| 15                      | febrile neutropenia.mp. or exp Febrile Neutropenia/                                                                                                                                                                                                                                       | 5289    |
| 16                      | severe congenital neutropenia.mp.                                                                                                                                                                                                                                                         | 419     |
| 17                      | leukopenia.mp. or exp Leukopenia/                                                                                                                                                                                                                                                         | 41579   |
| 18                      | granulocyte disorder.mp.                                                                                                                                                                                                                                                                  | 3       |
| 19                      | or/14-18                                                                                                                                                                                                                                                                                  | 58353   |
| 20                      | 13 and 19                                                                                                                                                                                                                                                                                 | 5255    |
| 21                      | chemotherapy.mp. [mp=title, abstract, original title, name of substance word, subject heading word, keyword heading word, protocol supplementary concept word, rare disease supplementary concept word, unique identifier]                                                                | 351195  |
| 22                      | cancer.mp. [mp=title, abstract, original title, name of substance word, subject heading word, keyword heading word, protocol supplementary concept word, rare disease supplementary concept word, unique identifier]                                                                      | 1296503 |
| 23                      | 20 and (21 or 22)                                                                                                                                                                                                                                                                         | 3034    |
| 24                      | Clinical study.mp.                                                                                                                                                                                                                                                                        | 46747   |
| 25                      | case control study.mp. or exp Case-Control Studies/                                                                                                                                                                                                                                       | 810115  |
| 26                      | Longitudinal study.mp. or exp Longitudinal Studies/                                                                                                                                                                                                                                       | 118291  |
| 27                      | Retrospective study.mp. or exp Retrospective Studies/                                                                                                                                                                                                                                     | 615012  |
| 28                      | Prospective study.mp. or exp Prospective Studies/                                                                                                                                                                                                                                         | 455641  |
| 29                      | Cohort analysis.mp. or exp Cohort Studies/                                                                                                                                                                                                                                                | 1558545 |
| 30                      | (Cohort adj (study or studies)).mp. [mp=title, abstract, original title, name of substance word, subject heading word, keyword heading word, protocol supplementary concept word, rare disease supplementary concept word, unique identifier]                                             | 269196  |
| 31                      | (follow up adj (study or studies)).mp. [mp=title, abstract, original title, name of substance word, subject heading word, keyword heading word, protocol supplementary concept word, rare disease supplementary concept word, unique identifier]                                          | 570656  |
| 32                      | (observational adj (study or studies)).mp. [mp=title, abstract, original title, name of substance word, subject heading word, keyword heading word, protocol supplementary concept word, rare disease supplementary concept word, unique identifier]                                      | 79298   |
| 33                      | (epidemiologic\$ adj (study or studies)).mp. [mp=title, abstract, original title, name of substance word, subject heading word, keyword heading word, protocol supplementary concept word, rare disease supplementary concept word, unique identifier]                                    | 74694   |
| 34                      | (cross sectional adj (study or studies)).mp. [mp=title, abstract, original title, name of substance word, subject heading word, keyword heading word, protocol supplementary concept word, rare disease supplementary concept                                                             | 252554  |



| Database,<br>search no. | Search string                                                                                                                                                                                                                                                                                                                    | Results |
|-------------------------|----------------------------------------------------------------------------------------------------------------------------------------------------------------------------------------------------------------------------------------------------------------------------------------------------------------------------------|---------|
| 35                      | word, unique identifier]<br>(random\$ or placebo\$ or single blind\$ or double blind\$ or triple blind\$).mp.<br>[mp=title, abstract, original title, name of substance word, subject heading<br>word, keyword heading word, protocol supplementary concept word, rare<br>disease supplementary concept word, unique identifier] | 1142818 |
| 36                      | (random sampl\$ or random digit\$ or random effect\$ or random survey or<br>random regression).mp. [mp=title, abstract, original title, name of substance<br>word, subject heading word, keyword heading word, protocol supplementary<br>concept word, rare disease supplementary concept word, unique identifier]               | 63278   |
| 37                      | 35 not 36                                                                                                                                                                                                                                                                                                                        | 1079540 |
| 38                      | cost*.ti.                                                                                                                                                                                                                                                                                                                        | 96236   |
| 39                      | exp "Costs and Cost Analysis"/                                                                                                                                                                                                                                                                                                   | 199212  |
| 40                      | or/38-39                                                                                                                                                                                                                                                                                                                         | 236046  |
| 41                      | or/24-34,37,40                                                                                                                                                                                                                                                                                                                   | 3225323 |
| 42                      | 41 and 23                                                                                                                                                                                                                                                                                                                        | 1184    |
| 43                      | (animals not (humans and animals)).sh.                                                                                                                                                                                                                                                                                           | 4231242 |
| 44                      | 42 not 43                                                                                                                                                                                                                                                                                                                        | 1180    |
| 45                      | limit 44 to ed=20150501-20160630                                                                                                                                                                                                                                                                                                 | 78      |
| <b>Cochrane</b>         |                                                                                                                                                                                                                                                                                                                                  |         |
| 1                       | Granulocyte colony stimulating factor.mp. or exp Granulocyte Colony-<br>Stimulating Factor/                                                                                                                                                                                                                                      | 2424    |
| 2                       | (G-CSF\$ or GCSF).mp. [mp=title, abstract, original title, name of substance<br>word, subject heading word, keyword heading word, protocol supplementary<br>concept word, rare disease supplementary concept word, unique identifier]                                                                                            | 1899    |
| 3                       | filgrastim.mp.                                                                                                                                                                                                                                                                                                                   | 745     |
| 4                       | (Neupogen or Zarzio or Nivestim or Ratiograstim).mp. [mp=title, abstract,<br>original title, name of substance word, subject heading word, keyword heading<br>word, protocol supplementary concept word, rare disease supplementary<br>concept word, unique identifier]                                                          | 48      |
| 5                       | Lenograstim.mp.                                                                                                                                                                                                                                                                                                                  | 209     |
| 6                       | Granocyte.mp.                                                                                                                                                                                                                                                                                                                    | 18      |
| 7                       | lipegfilgrastim.mp.                                                                                                                                                                                                                                                                                                              | 11      |
| 8                       | Pegfilgrastim.mp.                                                                                                                                                                                                                                                                                                                | 227     |
| 9                       | Neulasta.mp.                                                                                                                                                                                                                                                                                                                     | 14      |
| 10                      | (Biograstim or Tevagrastim or Grastofil or Accofil).mp. [mp=title, abstract,<br>original title, name of substance word, subject heading word, keyword heading<br>word, protocol supplementary concept word, rare disease supplementary<br>concept word, unique identifier]                                                       | 4       |
| 11                      | (Euproton or r-metHuG-CSF or SD-01 or PEG-rmetHuG-CSFor XM02).mp.<br>[mp=title, abstract, original title, name of substance word, subject heading<br>word, keyword heading word, protocol supplementary concept word, rare<br>disease supplementary concept word, unique identifier]                                             | 113     |
| 12                      | (Ro 25-8315m or Nartograstim or Empegfilgrastim or Maxy-G34 or BK0026 or<br>Ro 25-8315m or Nartograstim or Empegfilgrastim or Maxy-G34 or PEG-rHuG-                                                                                                                                                                              | 9       |

G-CSFs for chemotherapy-induced febrile neutropenia

| Database,<br>search no. | Search string                                                                                                                                                                                                                                          | Results |
|-------------------------|--------------------------------------------------------------------------------------------------------------------------------------------------------------------------------------------------------------------------------------------------------|---------|
|                         | CSF).mp. [mp=title, abstract, original title, name of substance word, subject heading word, keyword heading word, protocol supplementary concept word, rare disease supplementary concept word, unique identifier]                                     |         |
| 13                      | or/1-12                                                                                                                                                                                                                                                | 3442    |
| 14                      | neutropenia.mp. or exp Neutropenia/                                                                                                                                                                                                                    | 7161    |
| 15                      | febrile neutropenia.mp. or exp Febrile Neutropenia/                                                                                                                                                                                                    | 2072    |
| 16                      | severe congenital neutropenia.mp.                                                                                                                                                                                                                      | 3       |
| 17                      | leukopenia.mp. or exp Leukopenia/                                                                                                                                                                                                                      | 4732    |
| 18                      | granulocyte disorder.mp.                                                                                                                                                                                                                               | 0       |
| 19                      | or/14-18                                                                                                                                                                                                                                               | 9416    |
| 20                      | 13 and 19                                                                                                                                                                                                                                              | 1135    |
| 21                      | chemotherapy.mp. [mp=title, abstract, original title, name of substance word, subject heading word, keyword heading word, protocol supplementary concept word, rare disease supplementary concept word, unique identifier]                             | 39497   |
| 22                      | cancer.mp. [mp=title, abstract, original title, name of substance word, subject heading word, keyword heading word, protocol supplementary concept word, rare disease supplementary concept word, unique identifier]                                   | 78409   |
| 23                      | 20 and (21 or 22)                                                                                                                                                                                                                                      | 949     |
| 24                      | Clinical study.mp.                                                                                                                                                                                                                                     | 86699   |
| 25                      | case control study.mp. or exp Case-Control Studies/                                                                                                                                                                                                    | 14539   |
| 26                      | Longitudinal study.mp. or exp Longitudinal Studies/                                                                                                                                                                                                    | 117135  |
| 27                      | Retrospective study.mp. or exp Retrospective Studies/                                                                                                                                                                                                  | 10704   |
| 28                      | Prospective study.mp. or exp Prospective Studies/                                                                                                                                                                                                      | 97928   |
| 29                      | Cohort analysis.mp. or exp Cohort Studies/                                                                                                                                                                                                             | 126884  |
| 30                      | (Cohort adj (study or studies)).mp. [mp=title, abstract, original title, name of substance word, subject heading word, keyword heading word, protocol supplementary concept word, rare disease supplementary concept word, unique identifier]          | 15534   |
| 31                      | (follow up adj (study or studies)).mp. [mp=title, abstract, original title, name of substance word, subject heading word, keyword heading word, protocol supplementary concept word, rare disease supplementary concept word, unique identifier]       | 54823   |
| 32                      | (observational adj (study or studies)).mp. [mp=title, abstract, original title, name of substance word, subject heading word, keyword heading word, protocol supplementary concept word, rare disease supplementary concept word, unique identifier]   | 8880    |
| 33                      | (epidemiologic\$ adj (study or studies)).mp. [mp=title, abstract, original title, name of substance word, subject heading word, keyword heading word, protocol supplementary concept word, rare disease supplementary concept word, unique identifier] | 2811    |
| 34                      | (cross sectional adj (study or studies)).mp. [mp=title, abstract, original title, name of substance word, subject heading word, keyword heading word, protocol supplementary concept word, rare disease supplementary concept word, unique identifier] | 6213    |

G-CSFs for chemotherapy-induced febrile neutropenia

| <b>Database,<br/>search no.</b> | <b>Search string</b>                                                                                                                                                                                                                                                                                               | <b>Results</b> |
|---------------------------------|--------------------------------------------------------------------------------------------------------------------------------------------------------------------------------------------------------------------------------------------------------------------------------------------------------------------|----------------|
| 35                              | (random\$ or placebo\$ or single blind\$ or double blind\$ or triple blind\$).mp.<br>[mp=title, abstract, original title, name of substance word, subject heading<br>word, keyword heading word, protocol supplementary concept word, rare<br>disease supplementary concept word, unique identifier]               | 628540         |
| 36                              | (random sampl\$ or random digit\$ or random effect\$ or random survey or<br>random regression).mp. [mp=title, abstract, original title, name of substance<br>word, subject heading word, keyword heading word, protocol supplementary<br>concept word, rare disease supplementary concept word, unique identifier] | 17217          |
| 37                              | 35 not 36                                                                                                                                                                                                                                                                                                          | 611323         |
| 38                              | cost*.ti.                                                                                                                                                                                                                                                                                                          | 19736          |
| 39                              | exp "Costs and Cost Analysis"/                                                                                                                                                                                                                                                                                     | 23706          |
| 40                              | or/38-39                                                                                                                                                                                                                                                                                                           | 29547          |
| 41                              | or/24-34,37,40                                                                                                                                                                                                                                                                                                     | 680143         |
| 42                              | 41 and 23                                                                                                                                                                                                                                                                                                          | 789            |
| 43                              | (animals not (humans and animals)).sh.                                                                                                                                                                                                                                                                             | 19             |
| 44                              | 42 not 43                                                                                                                                                                                                                                                                                                          | 789            |
| 45                              | Limit 44 to yr="2015 -Current" [Limit not valid in DARE; records were retained]                                                                                                                                                                                                                                    | 74             |

G-CSFs for chemotherapy-induced febrile neutropenia

**Supplementary Appendix Table S3** Conference proceedings searched between 2012 and 2015 (or the most recent 3 years available)

| <b>Conference proceeding</b>                                                       | <b>Abbreviation</b> |
|------------------------------------------------------------------------------------|---------------------|
| International Society for Pharmacoeconomics and Outcomes Research                  | ISPOR               |
| European Society for Medical Oncology                                              | ESMO                |
| European Cancer Congress                                                           | ECC                 |
| American Society of Clinical Oncology                                              | ASCO                |
| American Society of Hematology                                                     | ASH                 |
| European Association of Hospital Pharmacists                                       | EAHP                |
| American Society of Health-System Pharmacists                                      | ASHP                |
| Multinational Association of Supportive Care in Cancer                             | MASCC               |
| International Society of Oral Oncology annual meeting on supportive care in cancer | ISOO                |

**Supplementary Appendix Table S4** Eligibility criteria used in the screening for studies of G-CSFs for the reduction of chemotherapy-induced FN

|                      | <b>Inclusion criteria</b>                                                                                                                                                                                                                                                                                                                                                                                                                                                                                                                                                                                                                                                                                                                                                                        | <b>Exclusion criteria</b>                                                                                                                                                                                                                         |
|----------------------|--------------------------------------------------------------------------------------------------------------------------------------------------------------------------------------------------------------------------------------------------------------------------------------------------------------------------------------------------------------------------------------------------------------------------------------------------------------------------------------------------------------------------------------------------------------------------------------------------------------------------------------------------------------------------------------------------------------------------------------------------------------------------------------------------|---------------------------------------------------------------------------------------------------------------------------------------------------------------------------------------------------------------------------------------------------|
| <b>Populations</b>   | <ul style="list-style-type: none"> <li>Adults (aged &gt;18 y) with non-myeloid malignancies receiving myelosuppressive anticancer drugs</li> <li>Adults (aged &gt;18 y) with acute myeloid leukemia receiving induction or consolidation chemotherapy</li> </ul>                                                                                                                                                                                                                                                                                                                                                                                                                                                                                                                                 | <ul style="list-style-type: none"> <li>Children aged &lt;18 y</li> <li>Animal/in vitro</li> <li>Patients with congenital (or nonchemotherapy-induced) neutropenia</li> <li>Patients with myeloid malignancies (e.g., multiple myeloma)</li> </ul> |
| <b>Interventions</b> | <ul style="list-style-type: none"> <li>Primary/secondary G-CSF prophylaxis or treatment with: <ul style="list-style-type: none"> <li>Lenograstim (Granocyte)</li> <li>Filgrastim (Neupogen, Zarzio, Nivestim, Ratiograstim)</li> <li>Long-acting (pegylated) filgrastim (pegfilgrastim, Neulasta)</li> <li>Lipegfilgrastim (Longquex)</li> <li>Ro 25-8315</li> <li>Empegfilgrastim</li> <li>Maxy-G34</li> <li>PEG-rHuG-CSF</li> <li>BK0026</li> </ul> </li> </ul>                                                                                                                                                                                                                                                                                                                                | <ul style="list-style-type: none"> <li>G-CSFs used to increase neutrophils prior to hematopoietic stem cell transplantation</li> </ul>                                                                                                            |
| <b>Comparator</b>    | Not restricted by comparator; may include any of the above interventions, placebo, or no comparator <sup>a</sup>                                                                                                                                                                                                                                                                                                                                                                                                                                                                                                                                                                                                                                                                                 | Publications that do not report a direct, head-to-head comparison of short- vs. long-acting G-CSFs <sup>a</sup>                                                                                                                                   |
| <b>Outcomes</b>      | <ul style="list-style-type: none"> <li>Incidence/risk of FN</li> <li>FN-related mortality</li> <li>Neutropenia-related hospitalizations or all cause hospitalizations</li> <li>Neutrophil profile</li> <li>Time to neutrophil recovery</li> <li>Duration of grade 3+ neutropenia</li> <li>Reduction/delay of chemotherapy dose</li> <li>Improvements in relative dose intensity</li> <li>Dosing-response relationships</li> <li>Compliance</li> <li>Antibiotic consumption due to FN</li> <li>Infection-related mortality</li> <li>Risk reductions of early all-cause mortality</li> <li>Transfusion and antibiotic requirements (type, dose and duration)</li> <li>Duration of fever after induction or consolidation chemotherapy</li> <li>Safety (e.g., bone pain, fever, malaise)</li> </ul> | Prognostic factors                                                                                                                                                                                                                                |

G-CSFs for chemotherapy-induced febrile neutropenia

|                         | Inclusion criteria                                                                                                                                                                                                                                                                                                                                                                                                                                                                                                                                                  | Exclusion criteria                                                                                                                                                                   |
|-------------------------|---------------------------------------------------------------------------------------------------------------------------------------------------------------------------------------------------------------------------------------------------------------------------------------------------------------------------------------------------------------------------------------------------------------------------------------------------------------------------------------------------------------------------------------------------------------------|--------------------------------------------------------------------------------------------------------------------------------------------------------------------------------------|
| <b>Study design</b>     | <ul style="list-style-type: none"> <li>• Economic impact (e.g., direct costs/resource use associated with clinical outcomes)</li> <li>• Randomized controlled trials</li> <li>• Observational or nonrandomized interventional studies</li> <li>• Cross-sectional surveys</li> <li>• Cohort studies</li> <li>• Case-control studies</li> <li>• Before and after studies</li> <li>• Prospective or retrospective studies</li> <li>• Longitudinal or follow-up studies</li> <li>• Insurance database studies/insurance claim review</li> <li>• Cost studies</li> </ul> | <ul style="list-style-type: none"> <li>• Pooled analyses</li> <li>• Economic evaluations (although were tagged)</li> <li>• Quality of life studies (although were tagged)</li> </ul> |
| <b>Publication type</b> | <ul style="list-style-type: none"> <li>• Report of primary data</li> <li>• Published from Jan 1, 2003, to date of search run</li> <li>• Published data only</li> </ul>                                                                                                                                                                                                                                                                                                                                                                                              | <ul style="list-style-type: none"> <li>• Reviews/editorials</li> <li>• Letters</li> <li>• Secondary publications</li> <li>• Systematic reviews</li> <li>• Meta-analyses</li> </ul>   |
| <b>Language</b>         | English language papers or foreign language papers with English abstract                                                                                                                                                                                                                                                                                                                                                                                                                                                                                            | Non-English languages                                                                                                                                                                |

*FN* febrile neutropenia, *G-CSF* granulocyte colony-stimulating factor

<sup>a</sup> Following the initial full paper review, a decision was taken to restrict publications of interest to those reporting a direct, head-to-head comparison of short- vs. long-acting G-CSFs, and to exclude publications that did not report a direct, head-to-head comparison of short- vs. long-acting G-CSFs

**Supplementary Appendix Table S5** Description of RCTs identified from the SLR that compared short- vs long-acting G-CSFs for the reduction of chemotherapy-induced FN

| Inclusion criteria                                                                                                                                                                                                            | Chemotherapy regimen (max. no. of cycles; cycle length) | Cancer type                        | Age, mean (±SD); [median] y | Interventions analyzed (no. of patients)                                                                                    |
|-------------------------------------------------------------------------------------------------------------------------------------------------------------------------------------------------------------------------------|---------------------------------------------------------|------------------------------------|-----------------------------|-----------------------------------------------------------------------------------------------------------------------------|
| <b>Bozzoli et al., 2015 [1]; prospective, randomized study; Italy</b>                                                                                                                                                         |                                                         |                                    |                             |                                                                                                                             |
| Pts 60–75 y that were considered suitable for treatment with R-CHOP-14                                                                                                                                                        | R-CHOP-14 (4–8; NR) <sup>a</sup>                        | DLBCL                              | [66]                        | Filgrastim, 300 µg QD from days 8–11 of each cycle ( <i>n</i> = 24)                                                         |
|                                                                                                                                                                                                                               |                                                         |                                    | [67]                        | Pegfilgrastim, 6 mg single dose on day 2 of each cycle ( <i>n</i> = 27)                                                     |
| <b>Filon et al., 2015 [2]; Nechaeva et al., 2015 [3]; phase III, double-dummy randomized, clinical study; Russia</b>                                                                                                          |                                                         |                                    |                             |                                                                                                                             |
| NR                                                                                                                                                                                                                            | Docetaxel + doxorubicin (NR; NR)                        | BC                                 | NR                          | Filgrastim, 5 µg/kg QD until ANC ≥10×10 <sup>9</sup> /L ( <i>n</i> = NR)                                                    |
|                                                                                                                                                                                                                               |                                                         |                                    | NR                          | Empegfilgrastim, 6 mg single dose/cycle ( <i>n</i> = NR)                                                                    |
|                                                                                                                                                                                                                               |                                                         |                                    | NR                          | Empegfilgrastim, 7.5 mg single dose/cycle ( <i>n</i> = NR)                                                                  |
|                                                                                                                                                                                                                               |                                                         |                                    | NR                          | Total, both groups: <i>N</i> = 135 (randomized 1:1:1 to each group)                                                         |
| <b>Green et al., 2003 [4]; randomized, double-blind, multicenter phase III study; worldwide</b>                                                                                                                               |                                                         |                                    |                             |                                                                                                                             |
| Pts aged >18 y; chemotherapy-naive or adjuvant therapy only or only 1 chemotherapy regimen for metastatic disease; ECOG PS ≤2; ANC ≥1.5×10 <sup>9</sup> /L; platelet count ≥100×10 <sup>9</sup> /L; serum creatinine <1.5×ULN | Doxorubicin + docetaxel (4; 21 days)                    | High-risk stage II or stage III/IV | 52.8 (11.5)                 | Filgrastim, 5 µg/kg QD from day 2 of each cycle until post-nadir ANC ≥10×10 <sup>9</sup> /L or for 14 days ( <i>n</i> = 75) |
|                                                                                                                                                                                                                               |                                                         | BC                                 | 52.1 (9.2)                  | Pegfilgrastim, 6 mg single dose on day 2 of each cycle ( <i>n</i> = 77)                                                     |
| <b>Grigg et al., 2003 [5]; multicenter, open-label, randomized, phase II, dose-finding study; worldwide</b>                                                                                                                   |                                                         |                                    |                             |                                                                                                                             |
| Pts aged ≥60 y; ECOG PS ≤2; ANC ≥2×10 <sup>9</sup> /L; platelet count ≥100×10 <sup>9</sup> /L; bilirubin concentration ≤2×ULN                                                                                                 | CHOP (6; 21 days)                                       | NHL                                | 67.5 (5.7)                  | Filgrastim, 5 µg/kg QD from day 2 of each cycle until post-nadir ANC ≥10×10 <sup>9</sup> /L or for 14 days ( <i>n</i> = 13) |
|                                                                                                                                                                                                                               |                                                         |                                    | 70.5 (5.3)                  | Pegfilgrastim, 60 µg/kg single dose                                                                                         |

G-CSFs for chemotherapy-induced febrile neutropenia

| Inclusion criteria                                                                                                                                                                                     | Chemotherapy regimen (max. no. of cycles; cycle length) | Cancer type                  | Age, mean (±SD); [median] y | Interventions analyzed (no. of patients)                                                                                                |
|--------------------------------------------------------------------------------------------------------------------------------------------------------------------------------------------------------|---------------------------------------------------------|------------------------------|-----------------------------|-----------------------------------------------------------------------------------------------------------------------------------------|
|                                                                                                                                                                                                        |                                                         |                              | 68.8 (6.3)                  | on day 2 of each cycle ( <i>n</i> = 13)<br>Pegfilgrastim, 100 µg/kg single dose on day 2 of each cycle ( <i>n</i> = 14)                 |
|                                                                                                                                                                                                        |                                                         |                              | 65.9 (5.5)                  | No cytokine support in cycle 1 followed by filgrastim 5 µg/kg QD in all other cycles ( <i>n</i> = 9)                                    |
| <b>Lopez et al., 2005 [6]; multicenter, parallel-group, open label Ph II study; Europe</b>                                                                                                             |                                                         |                              |                             |                                                                                                                                         |
| Pts aged 18–70 y; histologically confirmed, aggressive B-cell NHL with <30% bone marrow involvement and age-adjusted IPI score of 0–2; no prior treatment with chemotherapy or radiation therapy       | R-CHOP-14 (6; 14 days)                                  | B-cell NHL                   | NR                          | Filgrastim 5 µg/kg QD from days 2–13 of each cycle or until the ANC ≥10×10 <sup>9</sup> /L ( <i>n</i> = 26)                             |
|                                                                                                                                                                                                        |                                                         |                              | NR                          | Pegfilgrastim 6 mg single dose on day 2 of each cycle ( <i>n</i> = 32)                                                                  |
| <b>Park et al., 2013 [7]; multicenter, dose-finding, open-label, randomized Ph II study; Korea</b>                                                                                                     |                                                         |                              |                             |                                                                                                                                         |
| Pts aged >18 y; chemotherapy-naive; ECOG PS 0–1; ANC ≥1.5×10 <sup>9</sup> /L; platelet count ≥100×10 <sup>9</sup> /L; bilirubin <1.5×ULN; AST, ALT, or both <1.5×ULN and alkaline phosphatase <2.5×ULN | Docetaxel + doxorubicin + cyclophosphamide (6; 21 days) | High-risk stage II or III BC | 45.29 (6.13) [47]           | Filgrastim, 100 µg/m <sup>2</sup> QD on day 2 of each cycle until post-nadir ANC 5×10 <sup>9</sup> /L or up to 10 days ( <i>n</i> = 21) |
|                                                                                                                                                                                                        |                                                         |                              | 42.50 (5.62) [43]           | Pegfilgrastim (DA-3031) 3.6 mg single dose on day 2 of each cycle ( <i>n</i> = 20)                                                      |
|                                                                                                                                                                                                        |                                                         |                              | 46.95 (9.19) [46]           | Pegfilgrastim (DA-3031) 6 mg single dose on day 2 of each cycle ( <i>n</i> = 20)                                                        |
| <b>Ramkumar et al., 2013 [8]; multicenter, open-label, randomized study; India</b>                                                                                                                     |                                                         |                              |                             |                                                                                                                                         |
| Pts aged >18 y; chemotherapy-naive                                                                                                                                                                     | NR (6; NR)                                              | NSCLC or BC                  | NR                          | Filgrastim (Grafeel®) ( <i>n</i> = NR)                                                                                                  |
|                                                                                                                                                                                                        |                                                         |                              | NR                          | Peg G-CSF ( <i>n</i> = NR)                                                                                                              |
|                                                                                                                                                                                                        |                                                         |                              | NR                          | Total, both groups: <i>N</i> = 162                                                                                                      |
| <b>Salafet et al., 2013 [9]; randomized, open-label active-comparator, non-inferiority phase II study; Russia</b>                                                                                      |                                                         |                              |                             |                                                                                                                                         |
| NR                                                                                                                                                                                                     | Doxorubicin + docetaxel (NR; NR)                        | BC                           | NR                          | Filgrastim 5 mg/kg QD until ANC ≥10×10 <sup>9</sup> cells/L (maximum of 14                                                              |



| Inclusion criteria                                                                                                                                                        | Chemotherapy regimen (max. no. of cycles; cycle length)                                                                                                                                 | Cancer type                                    | Age, mean ( $\pm$ SD); [median] y | Interventions analyzed (no. of patients)                                                                                   |
|---------------------------------------------------------------------------------------------------------------------------------------------------------------------------|-----------------------------------------------------------------------------------------------------------------------------------------------------------------------------------------|------------------------------------------------|-----------------------------------|----------------------------------------------------------------------------------------------------------------------------|
|                                                                                                                                                                           |                                                                                                                                                                                         |                                                | NR                                | days), start day of G-CSF administration NR ( $n = 19$ )                                                                   |
|                                                                                                                                                                           |                                                                                                                                                                                         |                                                | NR                                | Empegfilgrastim (BCD-017) 3 mg, start day of G-CSF administration NR ( $n = 21$ )                                          |
|                                                                                                                                                                           |                                                                                                                                                                                         |                                                | NR                                | Empegfilgrastim (BCD-017) 6 mg, start day of G-CSF administration NR ( $n = 20$ )                                          |
| <b>Satheesh et al., 2009 [10]; randomized; India</b>                                                                                                                      |                                                                                                                                                                                         |                                                |                                   |                                                                                                                            |
| Pts aged <65 y with ECOG PS 0–1                                                                                                                                           | Doxorubicin + cyclophosphamide + docetaxel (NR; 21 days)                                                                                                                                | BC                                             | [57]                              | Filgrastim 5 mg/kg QD, start day and duration of G-CSF administration NR ( $n = 43$ )                                      |
|                                                                                                                                                                           |                                                                                                                                                                                         |                                                | [58]                              | Pegfilgrastim, 6 mg single dose, start day of G-CSF administration NR ( $n = 28$ )                                         |
| <b>Shi et al., 2006 [11]; randomized, multicenter, matched cross-over, open-label phase II study; China</b>                                                               |                                                                                                                                                                                         |                                                |                                   |                                                                                                                            |
| NR                                                                                                                                                                        | 2 cycles received, regimen (NR; NR)                                                                                                                                                     | NSCLC, BC, or NHL                              | NR                                | rhG-CSF 5 $\mu$ g/kg QD from day 3 of cycle until ANC $>5 \times 10^9$ /L twice after nadir or for 14 days                 |
|                                                                                                                                                                           |                                                                                                                                                                                         |                                                | NR                                | PEG-rhG-CSF 100 $\mu$ g/kg single dose on day 3 of cycle                                                                   |
|                                                                                                                                                                           |                                                                                                                                                                                         |                                                | NR                                | Total, both groups: $N = 104$                                                                                              |
| <b>Shi et al., 2013 [12]; phase III, randomized, multicenter, open-label, crossover, noninferiority study; China</b>                                                      |                                                                                                                                                                                         |                                                |                                   |                                                                                                                            |
| Pts aged 18–70 y; chemotherapy-naive; Karnofsky PS $\geq 70$ ; normal WBC and platelet counts; adequate renal, hepatic, and cardiac function; normal bone marrow function | Paclitaxel + carboplatin or cisplatin; doxorubicin, pirarubicin, or epirubicin + cyclophosphamide; paclitaxel + doxorubicin, pirarubicin, or epirubicin; CHOP <sup>b</sup> (2; 21 days) | NSCLC, BC, NHL, head and neck cancer, or other | 49.06 (10.35)<br>[51]             | Filgrastim 5 $\mu$ g/kg/ QD from day 3 of cycle until post-nadir ANC $\geq 10 \times 10^9$ /L or for 14 days ( $n = 157$ ) |
|                                                                                                                                                                           |                                                                                                                                                                                         |                                                | 50.37 (10.47)<br>[51]             | Pegfilgrastim 100 $\mu$ g/kg single dose on day 3 of cycle ( $n = 169$ )                                                   |

G-CSFs for chemotherapy-induced febrile neutropenia

| Inclusion criteria                                                                                                                                                       | Chemotherapy regimen (max. no. of cycles; cycle length)                              | Cancer type                           | Age, mean (±SD); [median] y | Interventions analyzed (no. of patients)                                                                                                                               |
|--------------------------------------------------------------------------------------------------------------------------------------------------------------------------|--------------------------------------------------------------------------------------|---------------------------------------|-----------------------------|------------------------------------------------------------------------------------------------------------------------------------------------------------------------|
| <b>Sierra et al., 2008 [13]; phase II, randomized, double-blind multicenter study; worldwide</b>                                                                         |                                                                                      |                                       |                             |                                                                                                                                                                        |
| Pts aged ≥18 y with ECOG PS ≤2 and life expectancy ≥3 mo                                                                                                                 | <b>Induction:</b> idarubicin + cytarabine; <b>Consolidation:</b> cytarabine (NR; NR) | De novo AML                           | [54]                        | Filgrastim, 5 µg/kg QD from day 2 of each cycle until post-nadir ANC ≥1×10 <sup>9</sup> /L for 3 consecutive days or ≥10×10 <sup>9</sup> /L for 1 day ( <i>n</i> = 41) |
|                                                                                                                                                                          |                                                                                      |                                       | [51]                        | Pegfilgrastim, 6 mg single dose on day 2 of each cycle ( <i>n</i> = 42)                                                                                                |
| <b>Vose et al., 2003 [14]; phase II, randomized, open-label, multicenter study; USA</b>                                                                                  |                                                                                      |                                       |                             |                                                                                                                                                                        |
| Pts aged ≥18 y; ECOG PS ≤2; ANC ≥1.5×10 <sup>9</sup> /L; platelet count ≥100×10 <sup>9</sup> /L; adequate renal function                                                 | ESHAP (NR; NR)                                                                       | Relapsed or refractory Hodgkin or NHL | 48.4 (15.9)                 | Filgrastim 5 µg/kg QD until post-nadir ANC ≥10×10 <sup>9</sup> /L or for 12 days ( <i>n</i> = 31)                                                                      |
|                                                                                                                                                                          |                                                                                      |                                       | 50.6 (13.9)                 | Pegfilgrastim 100 µg/kg single dose per cycle ( <i>n</i> = 29)                                                                                                         |
| <b>Zhang et al., 2015 [15]; randomized, open-label, multicenter dose-finding study; China</b>                                                                            |                                                                                      |                                       |                             |                                                                                                                                                                        |
| Pts aged 18–65 y; ECOG PS ≤1; ANC ≥2×10 <sup>9</sup> /L; WBC ≥4×10 <sup>9</sup> /L; platelet count ≥100×10 <sup>9</sup> /L; adequate renal, hepatic and cardiac function | Docetaxel + doxorubicin + cyclophosphamide (NR; 21 days)                             | High-risk BC                          | 47.35 (8.14)                | Filgrastim 5 µg/kg QD from day 3 of chemotherapy cycle until post-nadir ANC ≥10×10 <sup>9</sup> /L or for 14 days ( <i>n</i> = 43)                                     |
|                                                                                                                                                                          |                                                                                      |                                       | 47.03 (7.66)                | Pegfilgrastim 60 µg/kg single dose on day 3 of chemotherapy cycle ( <i>n</i> = 43)                                                                                     |
|                                                                                                                                                                          |                                                                                      |                                       | 48.18 (8.09)                | Pegfilgrastim 100 µg/kg single dose on day 3 of chemotherapy cycle ( <i>n</i> = 43)                                                                                    |
|                                                                                                                                                                          |                                                                                      |                                       | 46.71 (6.80)                | Pegfilgrastim 120 µg/kg single dose on day 3 of chemotherapy cycle ( <i>n</i> = 42)                                                                                    |
| <b>Zhang et al., 2014 [16]; randomized, match and crossover study; China</b>                                                                                             |                                                                                      |                                       |                             |                                                                                                                                                                        |
| NR                                                                                                                                                                       | NR (2; NR)                                                                           | NR                                    | NR                          | rhG-CSF 5 µg/kg QD SC injection                                                                                                                                        |

G-CSFs for chemotherapy-induced febrile neutropenia

| Inclusion criteria                                                                      | Chemotherapy regimen (max. no. of cycles; cycle length)         | Cancer type       | Age, mean (±SD); [median] y | Interventions analyzed (no. of patients)                                                                                             |
|-----------------------------------------------------------------------------------------|-----------------------------------------------------------------|-------------------|-----------------------------|--------------------------------------------------------------------------------------------------------------------------------------|
|                                                                                         |                                                                 |                   |                             | for 7 days until ANC >5 x 10 <sup>9</sup> /L ( <i>n</i> = NR)                                                                        |
|                                                                                         |                                                                 |                   | NR                          | PEG-rhG-CSF 100 µg/kg single SC injection ( <i>n</i> = NR)                                                                           |
|                                                                                         |                                                                 |                   | NR                          | Total, both groups: <i>N</i> = 42                                                                                                    |
| <b>Zhou et al., 2011 [17]; randomized, open-label, match and crossover study; China</b> |                                                                 |                   |                             |                                                                                                                                      |
| NR                                                                                      | NR (2; NR)                                                      | NSCLC, BC, or NHL | 46.51 (12.31)               | rhG-CSF 5 µg/kg QD from day 3 of chemotherapy cycle until ANC >5×10 <sup>9</sup> /L twice post-nadir or for 14 days ( <i>n</i> = 38) |
|                                                                                         |                                                                 |                   | 46.44 (11.98)               | PEG-rhG-CSF 100 µg/kg single SC injection on day 3 of chemotherapy cycle ( <i>n</i> = 40)                                            |
| <b>Zhou et al., 2013 [18]; randomized, open-label phase I study; China</b>              |                                                                 |                   |                             |                                                                                                                                      |
| Chemotherapy- and radiotherapy-naive patients                                           | Paclitaxel + carboplatin; epirubicin + cyclophosphamide (3; NR) | NR                | NR                          | rHuG-CSF 150 µg QD SC injection ( <i>n</i> = 15)                                                                                     |
|                                                                                         |                                                                 |                   | NR                          | rHuG-CSF 300 µg QD SC injection ( <i>n</i> = 15)                                                                                     |
|                                                                                         |                                                                 |                   | NR                          | YPEG-rHuG-CSF 10 µg/kg single SC injection ( <i>n</i> = 3)                                                                           |
|                                                                                         |                                                                 |                   | NR                          | YPEG-rHuG-CSF 20 µg/kg single SC injection ( <i>n</i> = 6)                                                                           |
|                                                                                         |                                                                 |                   | NR                          | YPEG-rHuG-CSF 30 µg/kg single SC injection ( <i>n</i> = 6)                                                                           |
|                                                                                         |                                                                 |                   | NR                          | YPEG-rHuG-CSF 45 µg/kg single SC injection ( <i>n</i> = 9)                                                                           |
|                                                                                         |                                                                 |                   | NR                          | YPEG-rHuG-CSF 60 µg/kg single SC injection ( <i>n</i> = 6)                                                                           |

## G-CSFs for chemotherapy-induced febrile neutropenia

*ALT* alanine aminotransferase, *AML* acute myeloid leukemia, *AST* aspartate aminotransferase, *ANC* absolute neutrophil count, *BC* breast cancer, *CHOP/R-CHOP* cyclophosphamide, doxorubicin, vincristine, and prednisone/CHOP and rituximab, *DLBCL* diffuse large B-cell lymphoma, *ECOG* Eastern Cooperative Oncology Group, *ESHAP* etoposide, methylprednisolone, cytarabine, and cisplatin, *FN* febrile neutropenia, *G-CSF* granulocyte colony-stimulating factor, *IPI* International Prognostic Index, *NHL* non-Hodgkin lymphoma, *NR* not reported, *NSCLC* non-small cell lung cancer, *PEG-rhG-CSF/YPEG-rHuG-CSF* recombinant human pegylated granulocyte colony-stimulating factor, *PS* performance score, *Pts* patients, *QD* once daily, *RCT* randomized controlled trial, *R-CHOP-14* cyclophosphamide, doxorubicin, vincristine, prednisone and rituximab administered every 14 days, *rhG-CSF/rHuG-CSF* recombinant human granulocyte colony-stimulating factor, *SC* subcutaneous, *SD* standard deviation, *SLR* systematic literature review, *ULN* upper limit of normal, *WBC* white blood cell

<sup>a</sup> Antibiotic prophylaxis with cotrimoxazole-sulfonamide for *Pneumocystis carinii*. Levofloxacin was added if neutrophil counts were  $<0.5 \times 10^9/L$  on day 8 and stopped upon recovery of neutrophil count [1]

<sup>b</sup> CHOP consisted of cyclophosphamide, doxorubicin (or pirarubicin) or epirubicin, vincristine, and prednisone [12]

**Supplementary Appendix Table S6** Description of non-RCTs identified from the SLR that compared short- vs long-acting G-CSFs for the reduction of chemotherapy-induced FN

| Inclusion criteria                                                                                                       | Chemotherapy regimen                                                                                                                                                                                                                                                                                                                                         | Cancer type                                                                                           | Age, mean (±SD), [median] y | Interventions analyzed (sample size)                                                                                                                                                                                                                          |
|--------------------------------------------------------------------------------------------------------------------------|--------------------------------------------------------------------------------------------------------------------------------------------------------------------------------------------------------------------------------------------------------------------------------------------------------------------------------------------------------------|-------------------------------------------------------------------------------------------------------|-----------------------------|---------------------------------------------------------------------------------------------------------------------------------------------------------------------------------------------------------------------------------------------------------------|
| <b>Almenar Cubells et al., 2013 [19]; multicenter, retrospective, observational two-cohort study; Spain</b>              |                                                                                                                                                                                                                                                                                                                                                              |                                                                                                       |                             |                                                                                                                                                                                                                                                               |
| Aged ≥18 y, pts who had undergone chemotherapy with ≥1 concomitant G-CSF (daily or non-daily) administration >2 mo prior | Platinum agent, taxane, mustard analogs, pyrimidine analog, or cytotoxic antibiotics                                                                                                                                                                                                                                                                         | Lung, gastrointestinal, gynecologic, head and neck, or other cancer                                   | 61.7 (12.2)                 | G-CSF QD (dose NR) starting within 3 days after chemotherapy (42.2% of patients) and continuing for ≥7 (10.5% of patients), ≥6 (14.3% of patients), and ≥5 (45.9% of patients) days ( <i>n</i> = 211: filgrastim, <i>n</i> = 196; lenograstim, <i>n</i> = 15) |
|                                                                                                                          |                                                                                                                                                                                                                                                                                                                                                              |                                                                                                       | 57.9 (13.7)                 | Pegfilgrastim single injection (dose NR) within 3 days after chemotherapy (46.2% of patients) ( <i>n</i> = 180)                                                                                                                                               |
| <b>Almenar et al., 2009 [20]; multicenter, retrospective, observational; Spain</b>                                       |                                                                                                                                                                                                                                                                                                                                                              |                                                                                                       |                             |                                                                                                                                                                                                                                                               |
| Pts who underwent chemotherapy supported by G-CSF treatment                                                              | <b>BC:</b> Anthracycline-based or taxane-based combination regimens, CMF, others<br><b>Lung cancer:</b> platinum-based or taxane-based combination regimens, platin + etoposide, gemcitabine, or vinorelbine; platin-taxane combination regimens; others<br><b>NHL:</b> R-CHOP-14, R-CHOP-21, others<br><b>Hodgkin's lymphoma:</b> doxorubicin + bleomycin + | NHL, Hodgkin lymphoma, multiple myeloma, breast, lung, gastrointestinal, gynecologic, or other cancer | 55.4 (14.5)                 | G-CSF QD (dose NR); median (range) of 6 (1–13) injections/cycle ( <i>n</i> = 111: filgrastim, <i>n</i> = 99; lenograstim, <i>n</i> = 12)                                                                                                                      |
|                                                                                                                          |                                                                                                                                                                                                                                                                                                                                                              |                                                                                                       | 57.0 (14.8)                 | Pegfilgrastim single injection (dose or cycle day NR) ( <i>n</i> = 75)                                                                                                                                                                                        |
|                                                                                                                          |                                                                                                                                                                                                                                                                                                                                                              |                                                                                                       | 59.3 (15.6)                 | Both daily G-CSF and pegfilgrastim ( <i>n</i> = 62) <sup>a</sup>                                                                                                                                                                                              |

G-CSFs for chemotherapy-induced febrile neutropenia

| Inclusion criteria                                                                                    | Chemotherapy regimen                                                                                                                                                                                                           | Cancer type | Age, mean (±SD), [median] y                                               | Interventions analyzed (sample size)                                                                                                                                                                                                                                                                                                                                                                                                                                                                                                                       |
|-------------------------------------------------------------------------------------------------------|--------------------------------------------------------------------------------------------------------------------------------------------------------------------------------------------------------------------------------|-------------|---------------------------------------------------------------------------|------------------------------------------------------------------------------------------------------------------------------------------------------------------------------------------------------------------------------------------------------------------------------------------------------------------------------------------------------------------------------------------------------------------------------------------------------------------------------------------------------------------------------------------------------------|
|                                                                                                       | vinblastine + dacarbazine; others<br><b>Multiple myeloma:</b> vincristine + carmustine + melphalan + cyclophosphamide + prednisolone; vincristine + carmustine + doxorubicin + dexamethasone; melphalan + prednisolone; others |             |                                                                           |                                                                                                                                                                                                                                                                                                                                                                                                                                                                                                                                                            |
| <b>Brito et al., 2012 [21]; Brito et al., 2016 [22]; single-center, retrospective study; Portugal</b> |                                                                                                                                                                                                                                |             |                                                                           |                                                                                                                                                                                                                                                                                                                                                                                                                                                                                                                                                            |
| Women who completed ≥1 cycle of chemotherapy                                                          | Adjuvant or neoadjuvant docetaxel + doxorubicin + cyclophosphamide                                                                                                                                                             | Early BC    | [52] (range, 27–70)<br><br>[52] (range, 28–76)<br><br>[48] (range, 25–67) | Reference filgrastim QD 300 or 480 µg in patients ≤75 and >75 kg, respectively; median (range) of 7 (1–10) administrations/cycle (11% of patients had <7 administrations); 833 total chemotherapy cycles ( <i>n</i> = 147)<br>Pegfilgrastim 6 mg single dose (cycle day NR); 761 total chemotherapy cycles ( <i>n</i> = 139)<br>Biosimilar filgrastim QD 300 or 480 µg in patients ≤75 and >75 kg, respectively; median (range) of 7 (3–9) administrations/cycle (12% of patients had <7 administrations); 761 total chemotherapy cycles ( <i>n</i> = 134) |
| <b>Chan et al., 2011 [23]; single-center, retrospective cohort; Asia</b>                              |                                                                                                                                                                                                                                |             |                                                                           |                                                                                                                                                                                                                                                                                                                                                                                                                                                                                                                                                            |
| Pts who underwent chemotherapy and received G-CSF as primary prophylaxis against FN <sup>b</sup>      | <b>Chemotherapy with FN risk &lt;20%:</b><br>R-CHOP-21, R-CEPP, R-CEOPP,                                                                                                                                                       | NHL         | 56.7 (13.1)                                                               | Filgrastim QD (dose NR); median (interquartile range) of 7 (5–8.25) administrations ( <i>n</i> = 81)                                                                                                                                                                                                                                                                                                                                                                                                                                                       |

G-CSFs for chemotherapy-induced febrile neutropenia

| Inclusion criteria                                                                                                                                                                                                         | Chemotherapy regimen                                                                                                     | Cancer type                                                              | Age, mean (±SD), [median] y                | Interventions analyzed (sample size)                                           |
|----------------------------------------------------------------------------------------------------------------------------------------------------------------------------------------------------------------------------|--------------------------------------------------------------------------------------------------------------------------|--------------------------------------------------------------------------|--------------------------------------------|--------------------------------------------------------------------------------|
|                                                                                                                                                                                                                            | R-CVP, or R-GDC<br><b>Chemotherapy with FN risk ≥20%:</b> GIFOX, HyperCVAD, R-CHOP-14, R-EPOCH, R-ESHAP, R-ICE, or SMILE |                                                                          | 55.3 (14.8)                                | Pegfilgrastim (dose or cycle day NR) single injection ( <i>n</i> = 123)        |
| <b>Hadji et al., 2012 [24]; Germany</b>                                                                                                                                                                                    |                                                                                                                          |                                                                          |                                            |                                                                                |
| Pts with ≥1 G-CSF prescription between Jan 2008 and Jul 2010 and observation period ≥6 mo prior to and after G-CSF prescription                                                                                            | NR                                                                                                                       | NR                                                                       | NR                                         | Originator filgrastim ( <i>n</i> = 8726)                                       |
|                                                                                                                                                                                                                            |                                                                                                                          |                                                                          | NR                                         | Biosimilar filgrastim ( <i>n</i> = 4240)                                       |
|                                                                                                                                                                                                                            |                                                                                                                          |                                                                          | NR                                         | Pegfilgrastim ( <i>n</i> = 9939)                                               |
|                                                                                                                                                                                                                            |                                                                                                                          |                                                                          | NR                                         | Lenograstim ( <i>n</i> = 6456)                                                 |
| <b>Heaney et al., 2009 [25]; retrospective matched cohort study; USA</b>                                                                                                                                                   |                                                                                                                          |                                                                          |                                            |                                                                                |
| Pts aged >18 y continuously enrolled in a health plan with ≥1 cancer claim, ≥2 filgrastim or ≥1 pegfilgrastim claim, and ≥1 chemotherapy claim                                                                             | NR                                                                                                                       | BC, lung cancer, NHL                                                     | 57.6 (11.6)                                | Filgrastim QD (dose NR) for 31 days ( <i>n</i> = 990)                          |
|                                                                                                                                                                                                                            |                                                                                                                          |                                                                          | 58.6 (11.5)                                | Pegfilgrastim (dose and dosing NR) for 58 days ( <i>n</i> = 982)               |
| <b>Henk et al., 2013 [26]; retrospective analysis; USA</b>                                                                                                                                                                 |                                                                                                                          |                                                                          |                                            |                                                                                |
| Pts aged ≥18 y; treated with myelosuppressive chemotherapy; and ≥1 claim for filgrastim, and/or pegfilgrastim, and/or sargramostim during chemotherapy course (two databases included HIRD <sup>SM</sup> and OptumInsight) | NR                                                                                                                       | NHL, Hodgkin lymphoma, breast, lung, colorectal, ovarian or solid tumors | <b>HIRD<sup>SM</sup>:</b><br>56.59 (11.32) | Filgrastim QD (dose NR) for a mean (±SD) of 6.41 (5.85) days ( <i>n</i> = 621) |
|                                                                                                                                                                                                                            |                                                                                                                          |                                                                          | 56.05 (11.33)                              | Pegfilgrastim (dose and dosing NR) ( <i>n</i> = 8569)                          |
|                                                                                                                                                                                                                            |                                                                                                                          |                                                                          | <b>Optum-Insight:</b><br>54.97 (11.20)     | Filgrastim QD (dose NR) for a mean (±SD) of 4.73 (2.98) days ( <i>n</i> = 628) |
|                                                                                                                                                                                                                            |                                                                                                                          |                                                                          | 54.84 (10.61)                              | Pegfilgrastim (dose and dosing NR) ( <i>n</i> = 6719)                          |
| <b>Hershman et al., 2009 [27]; retrospective, cohort study; USA</b>                                                                                                                                                        |                                                                                                                          |                                                                          |                                            |                                                                                |

G-CSFs for chemotherapy-induced febrile neutropenia

| Inclusion criteria                                                                                                                                                                                                                                                                                       | Chemotherapy regimen                                                                                                                                                                                                                                                                                         | Cancer type                                         | Age, mean (±SD), [median] y    | Interventions analyzed (sample size)                                                                                                   |
|----------------------------------------------------------------------------------------------------------------------------------------------------------------------------------------------------------------------------------------------------------------------------------------------------------|--------------------------------------------------------------------------------------------------------------------------------------------------------------------------------------------------------------------------------------------------------------------------------------------------------------|-----------------------------------------------------|--------------------------------|----------------------------------------------------------------------------------------------------------------------------------------|
| Pts who initiated chemotherapy in 2003                                                                                                                                                                                                                                                                   | NR                                                                                                                                                                                                                                                                                                           | Breast, lung, ovarian, or colon cancer, or lymphoma | NR                             | Filgrastim QD (dose NR) for a mean (±SD) of 6.5 (3.9) days in cycle 1 and 6.7 (4.0) days in subsequent cycles ( <i>n</i> = 101)        |
|                                                                                                                                                                                                                                                                                                          |                                                                                                                                                                                                                                                                                                              |                                                     | NR                             | Pegfilgrastim (dose and dosing NR) ( <i>n</i> = 721)                                                                                   |
| <b>Kourlaba et al., 2015 [28]; retrospective cohort study; Greece</b>                                                                                                                                                                                                                                    |                                                                                                                                                                                                                                                                                                              |                                                     |                                |                                                                                                                                        |
| Participants from two randomized trials and an observational study treated with dose-dense sequential chemotherapy and supported by use of G-CSF                                                                                                                                                         | Epirubicin → paclitaxel → CMF; Epirubicin + paclitaxel → CMF; epirubicin → CMF → docetaxel or paclitaxel                                                                                                                                                                                                     | BC                                                  | All pts: 52.3 (11.3)           | Filgrastim 5 µg/kg QD from days 2–7 of each cycle ( <i>n</i> = 529)<br>Pegfilgrastim 6 mg single dose (cycle day NR) ( <i>n</i> = 529) |
| <b>Kubista et al., 2003 [29]; retrospective study; worldwide</b>                                                                                                                                                                                                                                         |                                                                                                                                                                                                                                                                                                              |                                                     |                                |                                                                                                                                        |
| Pts aged ≥18 y; either chemotherapy-naïve or received adjuvant therapy and/or completed ≤1 regimen of chemotherapy for metastatic disease; completed any previous chemotherapy >3 wk before randomization; adequate hepatic and cardiac function; ECOG PS ≤2; ANC ≥15,000/µL; platelet count ≥100,000/µL | Doxorubicin → docetaxel was administered on day 1 of each cycle every 3 wk for maximum 4 cycles, unless a dose delay was necessary for low neutrophil or platelet counts. Pts were required to have recovered ANC >10,000/µL and platelet >100,000/µL counts before receiving next full dose of chemotherapy | High-risk stage II-IV<br>BC                         | <b>Study 1:</b><br>52.7 (11.5) | Filgrastim 5 µg/kg QD SC injection from day 2 of each cycle until post-nadir ANC ≥10,000/µL or for 14 days ( <i>n</i> = 76)            |
|                                                                                                                                                                                                                                                                                                          |                                                                                                                                                                                                                                                                                                              |                                                     | 51.9 (9.3)                     | Pegfilgrastim, 6 mg single SC injection on day 2 of each cycle ( <i>n</i> = 79)                                                        |
|                                                                                                                                                                                                                                                                                                          |                                                                                                                                                                                                                                                                                                              |                                                     | <b>Study 2:</b><br>51.9 (11.1) | Filgrastim 5 µg/kg QD SC injection from day 2 of each cycle until post-nadir ANC ≥10,000/µL or for 14 days ( <i>n</i> = 151)           |
|                                                                                                                                                                                                                                                                                                          |                                                                                                                                                                                                                                                                                                              |                                                     | 50.9 (11.6)                    | Pegfilgrastim 100 µg/kg single SC injection on day 2 of each cycle ( <i>n</i> = 150)                                                   |
| <b>Leonard et al., 2009 [30]; Leonard et al., 2015 [31]; multicenter trial (G-CSFs nonrandomized); UK</b>                                                                                                                                                                                                |                                                                                                                                                                                                                                                                                                              |                                                     |                                |                                                                                                                                        |
| Women aged >18 y who received standard chemotherapy, including                                                                                                                                                                                                                                           | Standard-dose adjuvant chemotherapy                                                                                                                                                                                                                                                                          | BC                                                  | NR                             | Filgrastim 5 µg/kg QD from days 3–9 of each cycle ( <i>n</i> = 129)                                                                    |



G-CSFs for chemotherapy-induced febrile neutropenia

| Inclusion criteria                                                                                                                 | Chemotherapy regimen                                                                                                                                  | Cancer type       | Age, mean (±SD), [median] y | Interventions analyzed (sample size)                                                                                                                                |
|------------------------------------------------------------------------------------------------------------------------------------|-------------------------------------------------------------------------------------------------------------------------------------------------------|-------------------|-----------------------------|---------------------------------------------------------------------------------------------------------------------------------------------------------------------|
| neoadjuvant chemotherapy                                                                                                           |                                                                                                                                                       |                   | NR                          | Pegfilgrastim, 6 mg single dose on day 2 of each cycle ( <i>n</i> = 75)                                                                                             |
| <b>Leung et al., 2012 [32]; prospective, observational and ethics-approved study; Canada</b>                                       |                                                                                                                                                       |                   |                             |                                                                                                                                                                     |
| Women who received neoadjuvant or adjuvant chemotherapy and pegfilgrastim or filgrastim                                            | 58% of pts received docetaxel-based chemotherapy                                                                                                      | BC                | NR                          | Filgrastim 300 µg QD SC injection initiated 24 hr after chemotherapy and continuing for 7–8 days ( <i>n</i> = NR; publication states one-third received filgrastim) |
|                                                                                                                                    |                                                                                                                                                       |                   | NR                          | Pegfilgrastim, 6 mg single SC injection 24 hr after chemotherapy ( <i>n</i> = NR; publication states two-thirds received pegfilgrastim)                             |
|                                                                                                                                    |                                                                                                                                                       |                   | 52                          | Total, both groups: <i>N</i> = 140                                                                                                                                  |
| <b>Leung et al., 2015 [33]; prospective, observational and comparative study; Canada</b>                                           |                                                                                                                                                       |                   |                             |                                                                                                                                                                     |
| Pts who received adjuvant or neoadjuvant chemotherapy with initiation of pegfilgrastim or filgrastim as primary prophylaxis for FN | Docetaxel ± cyclophosphamide; docetaxel + carboplatin + trastuzumab; other docetaxel-based regimens; cyclophosphamide + doxorubicin; FEC <sup>c</sup> | Non-metastatic BC | 51                          | Filgrastim 300 µg QD for a mean of 6.9 days ( <i>n</i> = 48)                                                                                                        |
|                                                                                                                                    |                                                                                                                                                       |                   | 52                          | Pegfilgrastim, 6 mg single dose on day 2 of chemotherapy cycle ( <i>n</i> = 94)                                                                                     |
| <b>Marina et al., 2009 [34]; multicenter, prospective, observational study; Spain</b>                                              |                                                                                                                                                       |                   |                             |                                                                                                                                                                     |
| Patients who initiated a chemotherapy regimen associated with ≥10% FN risk                                                         | Docetaxel or paclitaxel-containing regimens                                                                                                           | BC                | NR                          | Filgrastim (dose and dosing NR) ( <i>n</i> = NR)                                                                                                                    |
|                                                                                                                                    |                                                                                                                                                       |                   | NR                          | Pegfilgrastim (dose and dosing NR) ( <i>n</i> = NR)                                                                                                                 |
|                                                                                                                                    |                                                                                                                                                       |                   | [51]                        | Total, both groups: <i>N</i> = 735                                                                                                                                  |
| <b>Mates et al., 2012 [35]; retrospective cohort study; Canada</b>                                                                 |                                                                                                                                                       |                   |                             |                                                                                                                                                                     |
| Pts who received ≥1 cycle of modern adjuvant chemotherapy                                                                          | Anthracycline-taxane or taxane regimens                                                                                                               | Early BC          | All patients: [55]          | Filgrastim (dose and dosing NR) ( <i>n</i> = 47)                                                                                                                    |

G-CSFs for chemotherapy-induced febrile neutropenia

| Inclusion criteria                                                                                                                                                                 | Chemotherapy regimen                            | Cancer type                                         | Age, mean (±SD), [median] y | Interventions analyzed (sample size)                                                                                                                                                              |
|------------------------------------------------------------------------------------------------------------------------------------------------------------------------------------|-------------------------------------------------|-----------------------------------------------------|-----------------------------|---------------------------------------------------------------------------------------------------------------------------------------------------------------------------------------------------|
| (taxane-containing regimens ± anthracyclines) between Jan 2009 and Dec 2011                                                                                                        |                                                 |                                                     |                             | Pegfilgrastim (dose and dosing NR) ( <i>n</i> = 98)                                                                                                                                               |
| <b>Mazo et al., 2009 [36]; comparative study; Spain</b>                                                                                                                            |                                                 |                                                     |                             |                                                                                                                                                                                                   |
| Pts with high-grade NHL                                                                                                                                                            | R-CHOP-14 or R-EDOCH-14; 56 cycles administered | NHL                                                 | All pts: [63]               | Filgrastim 5 µg/kg QD for 5 days ( <i>n</i> = NR)<br><br>Pegfilgrastim 6 mg single dose on day 4 of each cycle ( <i>n</i> = NR)                                                                   |
| <b>Morrison et al., 2007 [37]; retrospective cohort study; USA</b>                                                                                                                 |                                                 |                                                     |                             |                                                                                                                                                                                                   |
| Patients aged ≥18 y; treated with chemotherapy and new users of filgrastim in 2001 (prior to approval of pegfilgrastim by FDA in Jan 2002), or filgrastim or pegfilgrastim in 2003 | NR                                              | Breast, lung, ovarian, or colon cancer; or lymphoma | NR                          | Filgrastim 2001 cohort, QD (dose NR) for a mean (±SD) of 5.2 (3.5) days in cycle 1 and 6.0 (3.5) days in subsequent cycles ( <i>n</i> = 583)                                                      |
|                                                                                                                                                                                    |                                                 |                                                     | NR                          | Filgrastim 2003 cohort, QD (dose NR) for a mean (±SD) of 3.7 (2.8) days in cycle 1 and 4.6 (3.2) days in subsequent cycles ( <i>n</i> = 868)                                                      |
|                                                                                                                                                                                    |                                                 |                                                     | NR                          | Pegfilgrastim, single injection (dose NR) initiated, on average (±SD), 2.4 (3.2) days after chemotherapy in cycle 1 and 1.9 (3.0) days after chemotherapy in subsequent cycles ( <i>n</i> = 1412) |
| <b>Naeim et al., 2010 [38]; retrospective US claims analysis; USA</b>                                                                                                              |                                                 |                                                     |                             |                                                                                                                                                                                                   |
| Filgrastim and pegfilgrastim-treated pts who received chemotherapy Jan 1, 2004, to Feb 28, 2009. Cycles were included if they were 20–60                                           | NR                                              | NHL, breast, lung, ovarian, or colorectal cancer    | NR                          | Filgrastim QD (dose and dosing NR); 852 cycles; ( <i>n</i> = NR)                                                                                                                                  |
|                                                                                                                                                                                    |                                                 |                                                     | NR                          | Pegfilgrastim, once-per-cycle (dose and dosing NR); 12,218                                                                                                                                        |

G-CSFs for chemotherapy-induced febrile neutropenia

| Inclusion criteria                                                                                                                                                                                                                                                                                                                    | Chemotherapy regimen                   | Cancer type                                       | Age, mean (±SD), [median] y    | Interventions analyzed (sample size)                                                                                                                                                |
|---------------------------------------------------------------------------------------------------------------------------------------------------------------------------------------------------------------------------------------------------------------------------------------------------------------------------------------|----------------------------------------|---------------------------------------------------|--------------------------------|-------------------------------------------------------------------------------------------------------------------------------------------------------------------------------------|
| days, as defined by chemotherapy claims. G-CSF use was designated 'prophylactic' if initiated in 1st 5 days of chemotherapy cycle, or 'delayed' if after day 5                                                                                                                                                                        |                                        |                                                   | 55                             | cycles; ( <i>n</i> = NR)<br><br>Total, both groups: <i>N</i> = 3958                                                                                                                 |
| <b>Naeim et al., 2013 [39]; retrospective US claims analysis; USA</b>                                                                                                                                                                                                                                                                 |                                        |                                                   |                                |                                                                                                                                                                                     |
| Pts with chemotherapy medical claims between Jan 1, 2005, and Feb 28, 2009; had ≥2 medical claims (≥7 days apart) with ICD-9 code(s) for NHL, or breast, lung, ovarian, or colorectal cancer from 30 days prior to up to 30 days after index date; and ≥1 claim for filgrastim or pegfilgrastim (not both) during chemotherapy course | NR                                     | NHL, breast, lung, ovarian, or colorectal cancer  | 57.5 (12.6)<br><br>55.1 (10.7) | Filgrastim QD (dose NR) for a mean (±SD) of 4.8 (3.3) injections/cycle ( <i>n</i> = 163)<br><br>Pegfilgrastim single injection (dose and cycle day NR) per-cycle ( <i>n</i> = 3372) |
| <b>Phillips et al., 2012 [40]; cost analysis and utilization management opportunity assessment; USA</b>                                                                                                                                                                                                                               |                                        |                                                   |                                |                                                                                                                                                                                     |
| Filgrastim and pegfilgrastim pharmacy and medical claims data were queried among 1.2 million commercially insured members from Jan 1, 2010, to Dec 31, 2010                                                                                                                                                                           | NR                                     | Lymphoma, or breast, lung, colon, or other cancer | NR<br><br>NR                   | Filgrastim 300 or 480 µg QD injection; 44.8% of pts had <7 cumulative days' supply ( <i>n</i> = 259)<br><br>Pegfilgrastim 6 mg single injection to last 14 days ( <i>n</i> = 612)   |
| <b>Salar et al., 2009 [41]; multicenter, prospective, observational, single-cohort study; Spain</b>                                                                                                                                                                                                                                   |                                        |                                                   |                                |                                                                                                                                                                                     |
| Adult pts who initiated new chemotherapy regimen associated with >10% FN risk; ≥4 planned cycles; and ≥3 mo expected survival time                                                                                                                                                                                                    | Most common regimen was CHOP or R-CHOP | Hodgkin's or NHL                                  | NR<br><br>NR<br><br>[58]       | Filgrastim (dose and dosing NR) ( <i>n</i> = NR)<br><br>Pegfilgrastim (dose and dosing NR) ( <i>n</i> = NR)<br><br>Total, both groups: <i>N</i> = 294                               |
| <b>Schippinger et al., 2006 [42]; retrospective study; Austria</b>                                                                                                                                                                                                                                                                    |                                        |                                                   |                                |                                                                                                                                                                                     |

G-CSFs for chemotherapy-induced febrile neutropenia

| Inclusion criteria                                                                                                                   | Chemotherapy regimen                                                                                                                       | Cancer type                   | Age, mean (±SD), [median] y | Interventions analyzed (sample size)                                                                                                                                                             |
|--------------------------------------------------------------------------------------------------------------------------------------|--------------------------------------------------------------------------------------------------------------------------------------------|-------------------------------|-----------------------------|--------------------------------------------------------------------------------------------------------------------------------------------------------------------------------------------------|
| Pts who received neoadjuvant or adjuvant chemotherapy between Oct 1993 and Nov 2005                                                  | Epirubicin + docetaxel or paclitaxel                                                                                                       | BC                            | All filgrastim pts:<br>47.3 | Filgrastim 300 or 480 µg (based on body weight) or lenograstim 340 µg, QD for median (range) of 6 (1–11) days ( <i>n</i> = 82)                                                                   |
|                                                                                                                                      |                                                                                                                                            |                               | 50.9                        | Filgrastim 300 or 480 µg (based on body weight) + lenograstim 340 µg QD for median (range) of 6 (1–11) days ( <i>n</i> = 6)<br>Pegfilgrastim, 6 mg single dose on day 2 of cycle ( <i>n</i> =30) |
| <b>Skarlos et al., 2009 [43]; retrospective, matched case-control study; Greece</b>                                                  |                                                                                                                                            |                               |                             |                                                                                                                                                                                                  |
| Pts who participated in 2 randomized trials (HE10/00 and HE10/05); treated with dose-dense sequential chemotherapy and G-CSF support | <b>Protocol HE10/00:</b><br>Epirubicin → paclitaxel → CMF;<br>epirubicin + paclitaxel → CMF;<br>epirubicin → CMF → docetaxel or paclitaxel | BC                            | 55                          | Filgrastim, 5 µg/kg QD on days 2–10 of each cycle ( <i>n</i> = 107)                                                                                                                              |
|                                                                                                                                      |                                                                                                                                            |                               | 54                          | Pegfilgrastim 6 mg single dose on day 1 of each cycle ( <i>n</i> = 107)                                                                                                                          |
| <b>Tan et al., 2011 [44]; retrospective cohort study; USA</b>                                                                        |                                                                                                                                            |                               |                             |                                                                                                                                                                                                  |
| Pts aged ≥18 y treated with chemotherapy between Jul 1, 2004, and Jan 31, 2008                                                       | NR                                                                                                                                         | NHL, or breast or lung cancer | 58.4 (11.0) [60]            | Filgrastim (dose NR) QD injection for ≤6 days (74% of cycles) and ≥9 days (18% of cycles); 616 filgrastim cycles; ( <i>n</i> = NR)                                                               |
|                                                                                                                                      |                                                                                                                                            |                               | 57.1 (11.6) [57]            | Pegfilgrastim, single injection (dose NR) on day 3 of cycle; 4955 pegfilgrastim cycles; ( <i>n</i> = NR)                                                                                         |
|                                                                                                                                      |                                                                                                                                            |                               | NR                          | Total, both groups: <i>N</i> = 1618                                                                                                                                                              |
| <b>von Minckwitz et al., 2008 [45]; post-hoc analysis of data from RCT (GEPARTRIO study [46]); Germany</b>                           |                                                                                                                                            |                               |                             |                                                                                                                                                                                                  |
| Pts aged ≥18 y; chemotherapy-naive; normal hematopoietic, liver,                                                                     | Doxorubicin → docetaxel + cyclophosphamide (six or eight                                                                                   | BC                            | NR                          | Filgrastim 5 µg/kg or lenograstim 150 µg/m <sup>2</sup> , QD from days 5–10                                                                                                                      |

G-CSFs for chemotherapy-induced febrile neutropenia

| Inclusion criteria                                                                                                                                                  | Chemotherapy regimen                                                                                                                                    | Cancer type                                                            | Age, mean (±SD), [median] y                | Interventions analyzed (sample size)                                                                                                                |
|---------------------------------------------------------------------------------------------------------------------------------------------------------------------|---------------------------------------------------------------------------------------------------------------------------------------------------------|------------------------------------------------------------------------|--------------------------------------------|-----------------------------------------------------------------------------------------------------------------------------------------------------|
| renal, and cardiac function                                                                                                                                         | 21-day cycles administered)                                                                                                                             |                                                                        | NR                                         | per cycle (n = 377)<br>Pegfilgrastim 6 mg single dose on day 2 of each cycle (n = 305)                                                              |
|                                                                                                                                                                     |                                                                                                                                                         |                                                                        | NR                                         | Pegfilgrastim 6 mg single dose on day 2 of each cycle + ciprofloxacin (n = 321)                                                                     |
|                                                                                                                                                                     |                                                                                                                                                         |                                                                        | NR                                         | Ciprofloxacin alone (n = 253)                                                                                                                       |
| <b>Wetten et al., 2015 [47]; retrospective cohort study; Germany</b>                                                                                                |                                                                                                                                                         |                                                                        |                                            |                                                                                                                                                     |
| Pts aged ≥18 y who received 1st-line chemotherapy associated with high/intermediate risk for FN from Jan 1, 2009, to Dec 31, 2013                                   | <b>Most common for BC:</b> docetaxel + doxorubicin + cyclophosphamide; FEC-docetaxel<br><b>Most common for NHL:</b> R-CHOP-21                           | BC or NHL (identified by ICD-10-GM)                                    | <b>Patients with BC:</b><br>52.66 (11.35)  | Filgrastim QD (dose NR); duration ≤5 (75.58%), >5 to 10 (22.77%), and >10 days (1.65%); (n = 606)<br>Pegfilgrastim (dose and dosing NR) (n = 1569)  |
|                                                                                                                                                                     |                                                                                                                                                         |                                                                        | <b>Patients with NHL:</b><br>62.76 (15.09) | Filgrastim QD (dose NR); duration ≤5 (54.02%), >5 to 10 (39.08%), and >10 days (6.90%); (n = 87)<br>Pegfilgrastim (dose and dosing NR) (n = 164)    |
| <b>Weycker et al., 2009 [48]; retrospective cohort study; USA</b>                                                                                                   |                                                                                                                                                         |                                                                        |                                            |                                                                                                                                                     |
| Pts with cancer who received pegfilgrastim, filgrastim, or sargramostim during their first course of chemotherapy                                                   | NR                                                                                                                                                      | NR                                                                     | NR                                         | Filgrastim (dose and dosing NR) (n = 2704)                                                                                                          |
|                                                                                                                                                                     |                                                                                                                                                         |                                                                        | NR                                         | Pegfilgrastim (dose and dosing NR) (n = 18,361)                                                                                                     |
| <b>Weycker et al., 2012 [49]; retrospective cohort study; USA</b>                                                                                                   |                                                                                                                                                         |                                                                        |                                            |                                                                                                                                                     |
| Pts aged ≥18 y with solid tumors who received chemotherapy between Jul 1, 2001, and Jun 30, 2007, and filgrastim, pegfilgrastim, or sargramostim prophylaxis during | <b>Most common for BC:</b> cyclophosphamide + doxorubicin<br><b>Most common for lung cancer:</b> carboplatin + etoposide<br><b>Most common for NHL:</b> | BC; NHL; trachea, bronchus and lung; prostate; colon/rectum; and other | 60 (12) [60]                               | Filgrastim QD (dose NR) for mean (±SD) 4.8 (3.4) days; 67% of patients received <7 days and 88% received <10 days; 8286 filgrastim cycles; (n = NR) |

G-CSFs for chemotherapy-induced febrile neutropenia

| Inclusion criteria         | Chemotherapy regimen                         | Cancer type | Age, mean (±SD), [median] y | Interventions analyzed (sample size)                                                                                             |
|----------------------------|----------------------------------------------|-------------|-----------------------------|----------------------------------------------------------------------------------------------------------------------------------|
| 1st course of chemotherapy | cyclophosphamide + doxorubicin + vincristine |             | 58 (12) [58]                | Pegfilgrastim (dose NR) single injection by day 3 of cycle in 94% of pegfilgrastim cycles; 67,247 pegfilgrastim cycles; (n = NR) |
|                            |                                              |             | NR                          | Total, both groups: N = 208,401                                                                                                  |

*ANC* absolute neutrophil count, *BC* breast cancer, *CEOPP/R-CEOPP* cyclophosphamide, etoposide, vincristine, prednisone and procarbazine/CEOPP and rituximab, *CEPP/R-CEPP* cyclophosphamide, etoposide, procarbazine and prednisone/CEPP and rituximab, *CHOP/R-CHOP* cyclophosphamide, doxorubicin, vincristine, and prednisone/CHOP and rituximab, *CHOP-14/R-CHOP-14* cyclophosphamide, doxorubicin, vincristine, and prednisone administered every 14 days/CHOP and rituximab administered every 14 days, *CHOP-21/R-CHOP-21* cyclophosphamide, doxorubicin, vincristine, and prednisone administered every 21 days/CHOP and rituximab administered every 21 days, *CMF* cyclophosphamide, methotrexate and 5-fluorouracil, *CVP/R-CVP* cyclophosphamide, vincristine, prednisone/CVP and rituximab, *GDC/R-GDC* gemcitabine, doxorubicin and cyclophosphamide/GDC and rituximab, *ECOG PS* Eastern Cooperative Oncology Group performance status, *R-EDOCH-14* etoposide, doxorubicin, vincristine, cyclophosphamide, dexamethasone and rituximab every 14 days, *EPOCH/R-EPOCH* etoposide, prednisone, vincristine, cyclophosphamide and doxorubicin/EPOCH and rituximab, *ESHAP/R-ESHAP* etoposide, methylprednisolone, cytarabine, and cisplatin/ESHAP and rituximab, *FDA* US Food and Drug Administration, *FEC* fluorouracil, epirubicin, and cyclophosphamide, *FN* febrile neutropenia, *G-CSF* granulocyte colony-stimulating factor, *GIFOX* gemcitabine, ifosfamide, and oxaliplatin, *HIRD* HealthCare Integrated Research Database, *HyperCVAD* hyperfractionated cyclophosphamide, vincristine, doxorubicin, and dexamethasone, *ICD-9-CM* The International Classification of Diseases, Ninth Revision, Clinical Modification, *ICD-10-GM* The International Classification of Diseases, Tenth Revision, German Modification, *ICE/R-ICE* ifosfamide, carboplatin, etoposide/ICE and rituximab, *IV* intravenous, *NHL* non-Hodgkin lymphoma, *non-RCT* non-randomized controlled trial, *NR* not reported, *pts* patients, *QD* once daily, *SC* subcutaneous, *SD* standard deviation, *SLR* systematic literature review, *SMILE* steroid [dexamethasone], methotrexate, ifosfamide, pegaspargase, and etoposide

<sup>a</sup> Patients randomized to both daily G-CSF and pegfilgrastim were excluded from analyses of G-CSF use and chemotherapy-related complications [20]

<sup>b</sup> Primary prophylaxis was defined as administration of G-CSF during the first cycle of chemotherapy in patients who had no documented history of neutropenia or FN. The G-CSF had to have been administered ≥24 h after the end of chemotherapy administration [23]

<sup>c</sup> All patients received antiemetic prophylaxis with ondansetron and dexamethasone, prior to chemotherapy and continuing for 2–3 days. With docetaxel-based regimens, dexamethasone commenced >24 h prior [33]

**Supplementary Appendix Table S7** List of relevant publications: Short- vs long-acting G-CSFs for the reduction of chemotherapy-induced FN<sup>a</sup>

| Reference                                                            | FN             | Hospitalizations | Dose reduction or delay | G-CSF duration <7 days/NR |
|----------------------------------------------------------------------|----------------|------------------|-------------------------|---------------------------|
| <b>RCT</b>                                                           |                |                  |                         |                           |
| Bozzoli <i>et al.</i> , 2015 [1]                                     | ✓              | ✓ <sup>b</sup>   | ✓ <sup>c</sup>          | Yes                       |
| Filon <i>et al.</i> , 2015 [2]; Nechaeva <i>et al.</i> , 2015 [3]    | ✓              |                  |                         | No                        |
| Green <i>et al.</i> , 2003 [4]                                       | ✓              | ✓                | ✓ <sup>c</sup>          | No                        |
| Grigg <i>et al.</i> , 2003 [5]                                       | ✓              | ✓                | ✓ <sup>c</sup>          | No                        |
| Lopez <i>et al.</i> , 2005 [6]                                       |                |                  | ✓ <sup>c</sup>          | No                        |
| Park <i>et al.</i> , 2013 [7]                                        | ✓              |                  |                         | No                        |
| Salafet <i>et al.</i> , 2013 [9]                                     | ✓              |                  |                         | No                        |
| Satheesh <i>et al.</i> , 2009 [10]                                   | ✓              | ✓                |                         | No                        |
| Shi <i>et al.</i> , 2006 [11]                                        | ✓              |                  |                         | No                        |
| Shi <i>et al.</i> , 2013 [12]                                        | ✓              |                  |                         | No                        |
| Sierra <i>et al.</i> , 2008 [13]                                     | ✓              | ✓ <sup>d</sup>   |                         | No                        |
| Zhang <i>et al.</i> , 2015 [15]                                      | ✓              |                  |                         | No                        |
| <b>Non-RCT</b>                                                       |                |                  |                         |                           |
| Almenar Cubells <i>et al.</i> , 2013 [19]                            | ✓              | ✓                | ✓                       | Yes <7 days               |
| Almenar <i>et al.</i> , 2009 [20]                                    | ✓              | ✓                | ✓                       | Yes <7 days               |
| Brito <i>et al.</i> , 2012 [21]; Brito <i>et al.</i> , 2016 [22]     | ✓              | ✓                | ✓                       | No                        |
| Chan <i>et al.</i> , 2011 [23]                                       | ✓              |                  | ✓                       | No                        |
| Heaney <i>et al.</i> , 2009 [25]                                     |                | ✓                |                         | No                        |
| Henk <i>et al.</i> , 2013 [26]                                       |                | ✓ <sup>d</sup>   |                         | Yes <7 days               |
| Hershman <i>et al.</i> , 2009 [27]                                   | ✓              |                  |                         | Yes <7 days               |
| Kourlaba <i>et al.</i> , 2015 [28]                                   | ✓              |                  | ✓                       | Yes <7 days               |
| Leonard <i>et al.</i> , 2009 [30]; Leonard <i>et al.</i> , 2015 [31] |                |                  | ✓ <sup>d</sup>          | No                        |
| Leung <i>et al.</i> , 2015 [33]                                      | ✓              |                  | ✓                       | Yes <7 days               |
| Marina <i>et al.</i> , 2009 [34]                                     |                | ✓ <sup>d</sup>   |                         | Yes NR                    |
| Mates <i>et al.</i> , 2012 [35]                                      | ✓              |                  |                         | Yes NR                    |
| Mazo <i>et al.</i> , 2009 [36]                                       |                | ✓ <sup>d</sup>   |                         | Yes <7 days               |
| Morrison <i>et al.</i> , 2007 [37]                                   | ✓              |                  |                         | Yes <7 days               |
| Naeim <i>et al.</i> , 2010 [38]                                      |                | ✓ <sup>d</sup>   |                         | Yes NR                    |
| Naeim <i>et al.</i> , 2013 [39]                                      |                | ✓                |                         | Yes <7 days               |
| Salar <i>et al.</i> , 2009 [41]                                      |                | ✓ <sup>d</sup>   | ✓ <sup>d</sup>          | Yes NR                    |
| Schippinger <i>et al.</i> , 2006 [42]                                | ✓              |                  |                         | Yes <7 days               |
| Skarlos <i>et al.</i> , 2009 [43]                                    | ✓ <sup>e</sup> |                  | ✓ <sup>e</sup>          | No PEG given day 1        |
| Tan <i>et al.</i> , 2011 [44]                                        | ✓              | ✓                |                         | Yes <7 days               |
| von Minckwitz <i>et al.</i> , 2008 [45]                              | ✓              | ✓                | ✓ <sup>d</sup>          | Yes <7 days               |
| Wetten <i>et al.</i> , 2015 [47]                                     |                | ✓ <sup>d</sup>   |                         | Yes <7 days               |
| Weycker <i>et al.</i> , 2009 [48]                                    |                | ✓                |                         | Yes NR                    |
| Weycker <i>et al.</i> , 2012 [49]                                    |                | ✓                |                         | Yes <7 days               |

## G-CSFs for chemotherapy-induced febrile neutropenia

*CIN* chemotherapy-induced neutropenia, *FN* febrile neutropenia, *G-CSF* granulocyte colony-stimulating factor, *NR* not reported, *non-RCT* non-randomized controlled trial, *PEG* pegylated, *RCT* randomized controlled trial

<sup>a</sup> Primary outcome (where stated) is highlighted in bold

<sup>b</sup> Excluded from meta-analysis due to hospitalizations being FN-related (compared with “all cause” in other RCTs)

<sup>c</sup> Meta-analysis not performed because dose reduction/delay/relative dose intensity was reported differently in each study

<sup>d</sup> Not included in meta-analysis because no individual numerical data were provided or because outcome was reported in non-comparable format

<sup>e</sup> Not included in meta-analysis as pegfilgrastim administered <24 hours after chemotherapy



**Supplementary Appendix Table S8** Short- vs long-acting G-CSFs for the reduction of chemotherapy-induced FN: Summary of FN outcomes

| Reference                                                         | Definition of FN                                                                    | Incidence and duration of FN                                                                                                                                                                                                                                                                                                                                                                                                           | Summary statistics reported                                                                          |
|-------------------------------------------------------------------|-------------------------------------------------------------------------------------|----------------------------------------------------------------------------------------------------------------------------------------------------------------------------------------------------------------------------------------------------------------------------------------------------------------------------------------------------------------------------------------------------------------------------------------|------------------------------------------------------------------------------------------------------|
| <b>RCT</b>                                                        |                                                                                     |                                                                                                                                                                                                                                                                                                                                                                                                                                        |                                                                                                      |
| Bozzoli <i>et al.</i> , 2015 [1]                                  | NR                                                                                  | <b>Incidence, n (%)</b><br><i>Per patient, overall cycles</i><br>Filgrastim (n = 24): 5 (21)<br>Pegfilgrastim (n = 27): 4 (15)<br><i>FN events per cycle</i><br>Filgrastim (n = 96 cycles): 7 (7.2)<br>Pegfilgrastim (n = 105 cycles): 6 (5.7)                                                                                                                                                                                         | Filgrastim vs pegfilgrastim,<br><i>P</i> = 0.7<br><br>Filgrastim vs pegfilgrastim,<br><i>P</i> = 0.8 |
| Filon <i>et al.</i> , 2015 [2]; Nechaeva <i>et al.</i> , 2015 [3] | NR                                                                                  | <b>Incidence, n</b><br>Filgrastim (n = NR): n = 1<br>Empegfilgrastim, 6 mg (n = NR): n = 1<br>Empegfilgrastim, 7.5 mg (n = NR): n = 1<br>Total no. of patients in all groups: N = 135<br>(randomized 1:1:1 to each group)                                                                                                                                                                                                              |                                                                                                      |
| Green <i>et al.</i> , 2003 [4]                                    | ANC <0.5×10 <sup>9</sup> /L with a coincidental oral equivalent temperature ≥38.2°C | <b>Incidence, n (%)</b><br><i>First cycle</i><br>Filgrastim (n = 75): 11 (15)<br>Pegfilgrastim (n = 77): 7 (9)<br><i>Overall cycles (1–4)</i><br>Filgrastim (n = 75): 15 (20)<br>Pegfilgrastim (n = 77): 10 (13)                                                                                                                                                                                                                       | The incidence of FN was not statistically different between pegfilgrastim and filgrastim             |
| Grigg <i>et al.</i> , 2003 [5]                                    | ANC <0.5×10 <sup>9</sup> /L and temperature >38.2°C                                 | <b>Incidence, n (%)</b><br><i>First cycle</i><br>Filgrastim (n = 13): 0 (0)<br>No cytokine support then filgrastim (n = 9): 0 (0)<br>Pegfilgrastim, 60 µg/kg (n = 13): 2 (15)<br>Pegfilgrastim, 100 µg/kg (n = 14): 0 (0)<br><i>Total no. of FN events</i><br>Filgrastim (n = 13): 1 (8)<br>No cytokine support then filgrastim (n = 9): 0 (0)<br>Pegfilgrastim, 60 µg/kg (n = 13): 4 (31)<br>Pegfilgrastim, 100 µg/kg (n = 14): 0 (0) | Incidence of FN was low                                                                              |
| Park <i>et al.</i> , 2013 [7]                                     | Grade 4 neutropenia                                                                 | <b>Incidence, n (%)</b>                                                                                                                                                                                                                                                                                                                                                                                                                | Filgrastim vs pegfilgrastim,                                                                         |

G-CSFs for chemotherapy-induced febrile neutropenia

| Reference                          | Definition of FN                                              | Incidence and duration of FN                                                                                                                                                                                                                                                                                                                               | Summary statistics reported                                                                                     |
|------------------------------------|---------------------------------------------------------------|------------------------------------------------------------------------------------------------------------------------------------------------------------------------------------------------------------------------------------------------------------------------------------------------------------------------------------------------------------|-----------------------------------------------------------------------------------------------------------------|
|                                    | ANC <0.5×10 <sup>9</sup> /L                                   | <i>Total no. of FN events, first cycle</i><br>Filgrastim ( <i>n</i> = 21): 2 (9.5)<br>Pegfilgrastim, 3.6 mg ( <i>n</i> = 20): 3 (15)<br>Pegfilgrastim, 6 mg: ( <i>n</i> = 20): 1 (5)                                                                                                                                                                       | <i>P</i> = 0.681                                                                                                |
| Salafet <i>et al.</i> , 2013 [9]   | NR                                                            | <b>Incidence, <i>n</i></b><br><i>Total no. of FN events</i><br>Filgrastim ( <i>n</i> = 19): 0<br>Empegfilgrastim, 3 mg ( <i>n</i> = 21): 1<br>Empegfilgrastim, 6 mg ( <i>n</i> = 20): 1                                                                                                                                                                    | Differences between empegfilgrastim groups and filgrastim group were not significant                            |
| Satheesh <i>et al.</i> , 2009 [10] | NR                                                            | <b>Incidence, %</b><br><i>Total no. of FN events</i><br>Filgrastim ( <i>n</i> = 43): 18.6<br>Pegfilgrastim ( <i>n</i> = 28): 10.7                                                                                                                                                                                                                          | A trend towards a lower incidence of FN was noted across all cycles with pegfilgrastim compared with filgrastim |
| Shi <i>et al.</i> , 2006 [11]      | NR                                                            | <b>Incidence, <i>n</i> (%)</b><br><i>Total no. of FN events</i><br>rhG-CSF ( <i>n</i> = NR): 0 (0)<br>PEG-rhG-CSF ( <i>n</i> = NR): 0 (0)<br>Total no. of patients: 104                                                                                                                                                                                    | None of the patients experienced FN                                                                             |
| Shi <i>et al.</i> , 2013 [12]      | ANC <0.5×10 <sup>9</sup> /L and auxiliary temperature >38.0°C | <b>Incidence, <i>n</i> (%)</b><br><i>Total no. of FN events</i><br>Filgrastim ( <i>n</i> = 313): 0 (0)<br>Pegfilgrastim ( <i>n</i> = 313): 1 (0.3)                                                                                                                                                                                                         | Filgrastim vs pegfilgrastim, <i>P</i> = 1.00                                                                    |
| Sierra <i>et al.</i> , 2008 [13]   | ANC <0.5×10 <sup>9</sup> /L and oral temperature ≥38.0°C      | <b>Incidence, <i>n</i> (%)</b><br><i>FN events during induction chemotherapy</i><br>Filgrastim ( <i>n</i> = 41): 36 (88)<br>Pegfilgrastim ( <i>n</i> = 42): 34 (81)<br><b>Duration, median (IQR) days</b><br><i>FN duration during induction chemotherapy</i><br>Filgrastim ( <i>n</i> = 41): 14 (11.5–18.5)<br>Pegfilgrastim ( <i>n</i> = 42): 15 (11–20) | No clinically meaningful difference between filgrastim and pegfilgrastim                                        |
| Zhang <i>et al.</i> , 2015 [15]    | An oral or oral equivalent temperature of ≥38.2°C for ≥1      | <b>Incidence, <i>n</i> (%)</b><br><i>First cycle</i>                                                                                                                                                                                                                                                                                                       | Filgrastim vs pegfilgrastim, <i>P</i> = 0.504                                                                   |

| Reference                                                           | Definition of FN                                                                             | Incidence and duration of FN                                                                                                                                                                                                                                                                                                                                                                                                       | Summary statistics reported                                                                                                                                                                                                                                                                                                                                            |
|---------------------------------------------------------------------|----------------------------------------------------------------------------------------------|------------------------------------------------------------------------------------------------------------------------------------------------------------------------------------------------------------------------------------------------------------------------------------------------------------------------------------------------------------------------------------------------------------------------------------|------------------------------------------------------------------------------------------------------------------------------------------------------------------------------------------------------------------------------------------------------------------------------------------------------------------------------------------------------------------------|
|                                                                     | h concurrent with an ANC <math><0.5 \times 10^9/L</math>                                     | Filgrastim ( $n = 43$ ): 5 (11.63)<br>Pegfilgrastim, 60 $\mu\text{g}/\text{kg}$ ( $n = 43$ ): 3 (6.98)<br>Pegfilgrastim, 100 $\mu\text{g}/\text{kg}$ ( $n = 43$ ): 2 (4.65)<br>Pegfilgrastim, 120 $\mu\text{g}/\text{kg}$ ( $n = 42$ ): 5 (11.90)                                                                                                                                                                                  |                                                                                                                                                                                                                                                                                                                                                                        |
| <b>Non-RCT</b>                                                      |                                                                                              |                                                                                                                                                                                                                                                                                                                                                                                                                                    |                                                                                                                                                                                                                                                                                                                                                                        |
| Almenar Cubells <i>et al.</i> , 2013 [19]                           | ANC <math><0.5 \times 10^9/L</math> and fever $\geq 38^\circ\text{C}$ within the same day    | <b>Incidence, <math>n</math> (%)</b><br>Daily G-CSF ( $n = 211$ ): 28 (13.3)<br>Pegfilgrastim ( $n = 180$ ): 12 (6.7)                                                                                                                                                                                                                                                                                                              | Filgrastim vs pegfilgrastim, $P = 0.032$                                                                                                                                                                                                                                                                                                                               |
| Almenar <i>et al.</i> , 2009 [20]                                   | NR                                                                                           | <b>Incidence, <math>n</math> (%) [95% CI]</b><br>Daily G-CSF ( $n = 111$ ): 27 (24.3) [17.2–33.1]<br>Pegfilgrastim ( $n = 75$ ): 8 (10.7) [5.3–19.9]                                                                                                                                                                                                                                                                               | Patients who were treated with pegfilgrastim appeared to have a numerically lower incidence of FN than those who received daily G-CSF; however, due to the descriptive nature of the analysis in this study, a conclusion of the significance cannot be made<br>No significant differences were found between the three groups in exploratory analyses of FN incidence |
| Brito <i>et al.</i> , 2012 [21];<br>Brito <i>et al.</i> , 2016 [22] | Body temperature $\geq 38^\circ\text{C}$ concurrent with ANC $\leq 500$ cells/ $\mu\text{L}$ | <b>Incidence, <math>n</math> (%)</b><br><i>No. of patients with <math>\geq 1</math> FN episode</i><br>Reference filgrastim ( $n = 147$ ): 23 (16)<br>Biosimilar filgrastim ( $n = 134$ ): 21 (16)<br>Pegfilgrastim ( $n = 140$ ): 12 (9)<br><br><i>No. of cycles with FN</i><br>Reference filgrastim ( $n = 833$ cycles): 27 (3)<br>Biosimilar filgrastim ( $n = 761$ cycles): 28 (4)<br>Pegfilgrastim ( $n = 761$ cycles): 17 (2) |                                                                                                                                                                                                                                                                                                                                                                        |
| Chan <i>et al.</i> , 2011 [23]                                      | Oral temperature $\geq 38.3^\circ\text{C}$ and ANC <math><0.5 \times 10^9/L</math>           | <b>Incidence, <math>n</math> (%)</b><br><i>First cycle</i><br>Filgrastim ( $n = 81$ ): 6 (7.4)<br>Pegfilgrastim ( $n = 123$ ): 11 (8.9)<br><i>Overall cycles</i><br>Filgrastim ( $n = 81$ ): 11 (13.6)<br>Pegfilgrastim ( $n = 123$ ): 20 (16.3)                                                                                                                                                                                   | Filgrastim vs pegfilgrastim, $P = 0.8$<br><br>Filgrastim vs pegfilgrastim, $P = 0.69$                                                                                                                                                                                                                                                                                  |

G-CSFs for chemotherapy-induced febrile neutropenia

| Reference                             | Definition of FN                                                                          | Incidence and duration of FN                                                                                                                                                                                                                                                                                      | Summary statistics reported                                                                                                  |
|---------------------------------------|-------------------------------------------------------------------------------------------|-------------------------------------------------------------------------------------------------------------------------------------------------------------------------------------------------------------------------------------------------------------------------------------------------------------------|------------------------------------------------------------------------------------------------------------------------------|
| Hershman <i>et al.</i> , 2009 [27]    | NR                                                                                        | <b>Incidence, %</b><br>Filgrastim ( <i>n</i> = 101): 6.9<br>Pegfilgrastim ( <i>n</i> = 721): 4.2<br>No primary prophylaxis ( <i>n</i> = 1523): 7.5                                                                                                                                                                | Filgrastim vs pegfilgrastim, not compared statistically                                                                      |
| Kourlaba <i>et al.</i> , 2015 [28]    | Body temperature >38.2°C and neutrophil count <0.5×10 <sup>9</sup> /L                     | <b>Incidence, <i>n</i> (%) [95% CI]</b><br>Filgrastim ( <i>n</i> = 529): 18 (3.4) [2.0, 5.3]<br>Pegfilgrastim ( <i>n</i> = 529): 23 (4.3) [2.8, 6.4]                                                                                                                                                              | Filgrastim vs pegfilgrastim, <i>P</i> = 0.500                                                                                |
| Leung <i>et al.</i> , 2015 [33]       | NR                                                                                        | <b>Incidence, <i>n</i> (%)</b><br>Filgrastim ( <i>n</i> = 48)<br>Pegfilgrastim ( <i>n</i> = 94)                                                                                                                                                                                                                   | No difference observed between filgrastim and pegfilgrastim                                                                  |
| Mates <i>et al.</i> , 2012 [35]       | NR                                                                                        | <b>Incidence, <i>n</i> (%)</b><br>Filgrastim ( <i>n</i> = 47): 13 (28)<br>Pegfilgrastim ( <i>n</i> = 98): 8 (8)                                                                                                                                                                                                   | Filgrastim vs pegfilgrastim; OR 4.3, <i>P</i> = 0.003                                                                        |
| Morrison <i>et al.</i> , 2007 [37]    | Single oral temperature of ≥38.3°C (101°F), or ≥38.0°C (100.4°F) for ≥1 h and neutropenia | <b>Incidence, <i>n</i> (%)</b><br>Filgrastim (cohort 1; <i>n</i> = 583): 31 (5.3)<br>Filgrastim (cohort 2; <i>n</i> = 868): 63 (7.3)<br>Pegfilgrastim ( <i>n</i> = 1412): 67 (4.7)                                                                                                                                | Filgrastim (cohort 1) vs pegfilgrastim, <i>P</i> = 0.591<br>Filgrastim (cohort 2) vs pegfilgrastim, <i>P</i> = 0.012         |
| Schippinger <i>et al.</i> , 2006 [42] | ANC <1000/μL and fever >38°C measured ≥2× in 24 h, or 1 fever episode of ≥38.3°C in 24 h  | <b>Incidence, <i>n</i> (%)</b><br><i>First cycle</i><br>Filgrastim or lenograstim ( <i>n</i> = 88): 8 (9.1)<br>Pegfilgrastim ( <i>n</i> = 30): 1 (3.3)<br><i>Total FN events in all cycles</i><br>Filgrastim or lenograstim ( <i>n</i> = 476 cycles): 13 (2.7)<br>Pegfilgrastim ( <i>n</i> = 172 cycles): 2 (1.2) | Filgrastim or lenograstim vs pegfilgrastim, <i>P</i> = 0.445<br>Filgrastim or lenograstim vs pegfilgrastim, <i>P</i> = 0.376 |
| Skarlos <i>et al.</i> , 2009 [43]     | Body temperature >38.2°C and neutrophil count <0.5×10 <sup>9</sup> /L                     | <b>Incidence, <i>n</i> (%)</b><br>Filgrastim ( <i>n</i> = 107): 1 (1)<br>Pegfilgrastim ( <i>n</i> = 107): 14 (13)                                                                                                                                                                                                 | Filgrastim vs pegfilgrastim, <i>P</i> = 0.001                                                                                |
| Tan <i>et al.</i> , 2011 [44]         | NR                                                                                        | <b>Incidence, %</b><br><i>FN or infection</i><br>Filgrastim ( <i>n</i> = 616 cycles): 42<br>Pegfilgrastim ( <i>n</i> = 4955 cycles): 49                                                                                                                                                                           | Filgrastim vs pegfilgrastim, <i>P</i> = 0.002                                                                                |

G-CSFs for chemotherapy-induced febrile neutropenia

| Reference                               | Definition of FN                                                                                                          | Incidence and duration of FN                                                                                                                                                                                       | Summary statistics reported            |
|-----------------------------------------|---------------------------------------------------------------------------------------------------------------------------|--------------------------------------------------------------------------------------------------------------------------------------------------------------------------------------------------------------------|----------------------------------------|
| von Minckwitz <i>et al.</i> , 2008 [45] | Three oral temperature determinations >38°C during a 24-h period/single elevation >38.5°C and ANC <1.0×10 <sup>9</sup> /L | <b>Incidence, n (%)</b><br><i>Overall cycles (1–5)</i><br>Daily G-CSF (n = 374): 67 (18)<br>Pegfilgrastim (n = 303): 22 (7)<br>Pegfilgrastim + ciprofloxacin (n = 314): 17 (5)<br>Ciprofloxacin (n = 253): 55 (22) | Filgrastim vs pegfilgrastim, P < 0.001 |

ANC absolute neutrophil count, CI confidence interval, FN febrile neutropenia, G-CSF granulocyte colony-stimulating factor, IQR interquartile range, NR not reported, non-RCT non-randomized controlled trial, OR odds ratio, PEG-rhG-CSF pegylated recombinant human granulocyte colony-stimulating factor, rh-G-CSF recombinant human granulocyte colony-stimulating factor, RCT randomized controlled trial

**Supplementary Appendix Table S9** Short- vs long-acting G-CSFs for the reduction of chemotherapy-induced FN: Summary of hospitalization outcomes

| Reference                                 | Hospitalization outcome                                                                                                                                                                                                                                                                                                                                                               | Summary statistics reported                                                                                                                                                                         |
|-------------------------------------------|---------------------------------------------------------------------------------------------------------------------------------------------------------------------------------------------------------------------------------------------------------------------------------------------------------------------------------------------------------------------------------------|-----------------------------------------------------------------------------------------------------------------------------------------------------------------------------------------------------|
| <b>RCT</b>                                |                                                                                                                                                                                                                                                                                                                                                                                       |                                                                                                                                                                                                     |
| Bozzoli <i>et al.</i> , 2015 [1]          | <b>Unplanned hospitalization, all cycles, <i>n</i> (%)</b><br>Filgrastim ( <i>n</i> = 96 cycles): 5 (5.2)<br>Pegfilgrastim ( <i>n</i> = 105 cycles): 7 (6.7)<br>Total ( <i>n</i> = 201 cycles): 12 (6)                                                                                                                                                                                | Filgrastim vs pegfilgrastim, <i>P</i> = 0.8                                                                                                                                                         |
| Green <i>et al.</i> , 2003 [4]            | <b>Rate of hospitalization, %</b><br>Filgrastim ( <i>n</i> = 75): 31<br>Pegfilgrastim ( <i>n</i> = 77): 18                                                                                                                                                                                                                                                                            | Rates of hospitalization were generally consistent with the results obtained for the incidence of FN                                                                                                |
| Grigg <i>et al.</i> , 2003 [5]            | <b>Rate of hospitalization, <i>n</i> (%)</b><br>Filgrastim ( <i>n</i> = 22): 12<br>Pegfilgrastim ( <i>n</i> = 27): 10<br><b>Hospitalization due to AEs, <i>n</i></b><br>Filgrastim ( <i>n</i> = 22): 4 (18)<br>Pegfilgrastim ( <i>n</i> = 27): 6 (22)                                                                                                                                 | Comparable numbers between filgrastim and pegfilgrastim groups were hospitalized with similar numbers due to AEs; other hospitalizations were for routine procedures or chemotherapy administration |
| Satheesh <i>et al.</i> , 2009 [10]        | <b>Rate of hospitalization, %</b><br>Filgrastim ( <i>n</i> = 43): 25.6<br>Pegfilgrastim ( <i>n</i> = 28): 17.8                                                                                                                                                                                                                                                                        | No statistical analysis reported                                                                                                                                                                    |
| Sierra <i>et al.</i> , 2008 [13]          | <b>Incidence and duration</b><br>Filgrastim ( <i>n</i> = 41)<br>Pegfilgrastim ( <i>n</i> = 42)                                                                                                                                                                                                                                                                                        | The incidence and duration of hospitalization was similar in the 2 treatment groups, with nearly all patients being hospitalized, as per routine clinical practice                                  |
| <b>Non-RCT</b>                            |                                                                                                                                                                                                                                                                                                                                                                                       |                                                                                                                                                                                                     |
| Almenar Cubells <i>et al.</i> , 2013 [19] | <b>Outcome, <i>n</i> (%)</b><br><i>Total hospitalization incidents</i><br>Daily G-CSF ( <i>n</i> = 211): 71 (33.6)<br>Pegfilgrastim ( <i>n</i> = 180): 46 (25.6)<br><i>Hospitalization due to FN</i><br>Daily G-CSF ( <i>n</i> = 211): 23 (10.9)<br>Pegfilgrastim ( <i>n</i> = 180): 5 (2.8)<br><i>Hospitalization due to neutropenia</i><br>Daily G-CSF ( <i>n</i> = 211): 31 (14.7) | Daily G-CSF vs pegfilgrastim, <i>P</i> = 0.002                                                                                                                                                      |

| Reference                                                          | Hospitalization outcome                                                                                | Summary statistics reported                                  |
|--------------------------------------------------------------------|--------------------------------------------------------------------------------------------------------|--------------------------------------------------------------|
| Almenar <i>et al.</i> , 2009 [20]                                  | Pegfilgrastim ( <i>n</i> = 180): 7 (3.9)<br><i>Hospitalization due to severe neutropenia</i>           | Daily G-CSF vs pegfilgrastim,<br><i>P</i> = 0.001            |
|                                                                    | Daily G-CSF ( <i>n</i> = 211): 26 (12.3)                                                               |                                                              |
|                                                                    | Pegfilgrastim ( <i>n</i> = 180): 6 (3.3)<br><i>Hospitalization due to fever</i>                        |                                                              |
|                                                                    | Daily G-CSF ( <i>n</i> = 211): 9 (4.3)                                                                 |                                                              |
|                                                                    | Pegfilgrastim ( <i>n</i> = 180): 7 (3.9)<br><i>Hospitalization due to pancytopenia</i>                 |                                                              |
|                                                                    | Daily G-CSF ( <i>n</i> = 211): 6 (2.8)                                                                 |                                                              |
|                                                                    | Pegfilgrastim ( <i>n</i> = 180): 2 (1.1)<br><i>Hospitalization due to other hematologic toxicities</i> |                                                              |
|                                                                    | Daily G-CSF ( <i>n</i> = 211): 6 (2.8)                                                                 |                                                              |
|                                                                    | Pegfilgrastim ( <i>n</i> = 180): 2 (1.1)                                                               |                                                              |
|                                                                    | <b>Hospitalization due to FN, <i>n</i> (%) [95% CI]</b>                                                |                                                              |
| Daily G-CSF ( <i>n</i> = 111): 22 (19.8) [13.4–28.3]               |                                                                                                        |                                                              |
| Pegfilgrastim ( <i>n</i> = 75): 7 (9.3) [4.3–18.3]                 |                                                                                                        |                                                              |
| <b>Hospitalization, No. hospitalizations/No. cycles with FN, %</b> |                                                                                                        |                                                              |
| Reference filgrastim ( <i>n</i> = 147): 20/27 (74)                 |                                                                                                        |                                                              |
| Biosimilar filgrastim ( <i>n</i> = 134): 19/28 (68)                |                                                                                                        |                                                              |
| Pegfilgrastim ( <i>n</i> = 139): 14/17 (82)                        |                                                                                                        |                                                              |
| <b>Duration of hospitalization, median (range), days</b>           |                                                                                                        |                                                              |
| Reference filgrastim ( <i>n</i> = 147): 5 (1–17)                   |                                                                                                        |                                                              |
| Biosimilar filgrastim ( <i>n</i> = 134): 4 (1–10)                  |                                                                                                        |                                                              |
| Pegfilgrastim ( <i>n</i> = 761): 4 (1–8)                           |                                                                                                        |                                                              |
| Heaney <i>et al.</i> , 2009 [25]                                   | <b>Outcome, No. of events (incidence rate) [95% CI]</b>                                                | Study did not directly compare filgrastim with pegfilgrastim |
|                                                                    | <i>Hospitalization due to FN</i>                                                                       |                                                              |
|                                                                    | Filgrastim ( <i>n</i> = 990): 7 (0.08) [0.03–0.17]                                                     |                                                              |
|                                                                    | Pegfilgrastim ( <i>n</i> = 982): 9 (0.06) [0.03–0.11]<br><i>Hospitalization due to infection</i>       |                                                              |

| Reference                                 | Hospitalization outcome                                                                                                                      | Summary statistics reported                                                                                                                                               |
|-------------------------------------------|----------------------------------------------------------------------------------------------------------------------------------------------|---------------------------------------------------------------------------------------------------------------------------------------------------------------------------|
| Henk <i>et al.</i> , 2013 [26]            | Filgrastim ( <i>n</i> = 990): 22 (0.26) [0.15–0.37]<br>Pegfilgrastim ( <i>n</i> = 982): 37 (0.24) [0.16–0.31]                                |                                                                                                                                                                           |
|                                           | <b>Database analysis 1 (HIRD)</b>                                                                                                            |                                                                                                                                                                           |
|                                           | <i>Neutropenia-related hospitalization</i>                                                                                                   |                                                                                                                                                                           |
|                                           | Filgrastim ( <i>n</i> = 1669 cycles)                                                                                                         | Filgrastim vs pegfilgrastim, OR (95% CI) 1.78 (1.28–2.48)                                                                                                                 |
|                                           | Pegfilgrastim ( <i>n</i> =28,189 cycles)                                                                                                     |                                                                                                                                                                           |
|                                           | <i>All-cause hospitalization</i>                                                                                                             |                                                                                                                                                                           |
|                                           | Filgrastim ( <i>n</i> = 1669 cycles)                                                                                                         | Filgrastim vs pegfilgrastim, OR (95% CI) 1.57 (1.25–1.97)                                                                                                                 |
|                                           | Pegfilgrastim ( <i>n</i> = 28,189 cycles)                                                                                                    |                                                                                                                                                                           |
|                                           | <b>Database analysis 2 (OptumInsight)</b>                                                                                                    |                                                                                                                                                                           |
|                                           | <i>Neutropenia-related hospitalization</i>                                                                                                   |                                                                                                                                                                           |
| Filgrastim ( <i>n</i> = 1351 cycles)      | Filgrastim vs pegfilgrastim, OR (95% CI) 2.36 (1.82–3.06)                                                                                    |                                                                                                                                                                           |
| Pegfilgrastim ( <i>n</i> = 22,649 cycles) |                                                                                                                                              |                                                                                                                                                                           |
| <i>All-cause hospitalization</i>          |                                                                                                                                              |                                                                                                                                                                           |
| Filgrastim ( <i>n</i> = 1351 cycles)      | Filgrastim vs pegfilgrastim, OR (95% CI) 1.95 (1.60–2.38)                                                                                    |                                                                                                                                                                           |
| Pegfilgrastim ( <i>n</i> = 22,649 cycles) |                                                                                                                                              |                                                                                                                                                                           |
|                                           |                                                                                                                                              | Analysis of both the databases showed that filgrastim prophylaxis had a higher risk of neutropenia-related hospitalization and all-cause hospitalization vs pegfilgrastim |
| Marina <i>et al.</i> , 2009 [34]          | <b>Hospitalization due to FN</b><br>Filgrastim ( <i>n</i> = NR)<br>Pegfilgrastim ( <i>n</i> = NR)                                            | No differences in FN hospitalization between filgrastim vs pegfilgrastim                                                                                                  |
| Mazo <i>et al.</i> , 2009 [36]            | <b>Hospitalization due to feverish neutropenic episodes, <i>n</i></b><br>Filgrastim ( <i>n</i> = NR): 2<br>Pegfilgrastim ( <i>n</i> = NR): 3 | No significant differences between filgrastim and pegfilgrastim were observed                                                                                             |
| Naeim <i>et al.</i> , 2010 [38]           | <b>Outcome, mean per cycle</b>                                                                                                               |                                                                                                                                                                           |
|                                           | <i>Total hospitalization incidents</i>                                                                                                       |                                                                                                                                                                           |
|                                           | Filgrastim ( <i>n</i> = 852 cycles): 0.13<br>Pegfilgrastim ( <i>n</i> = 12,218 cycles): 0.06                                                 | Filgrastim vs pegfilgrastim, <i>P</i> < 0.001                                                                                                                             |
|                                           | <i>Total ambulatory visits</i>                                                                                                               |                                                                                                                                                                           |
|                                           | Filgrastim ( <i>n</i> = 852 cycles): 8.6<br>Pegfilgrastim ( <i>n</i> = 12,218 cycles): 5.5<br><i>Total emergency room visits</i>             | Filgrastim vs pegfilgrastim, <i>P</i> < 0.001                                                                                                                             |



| Reference                               | Hospitalization outcome                                                                                                                                                                                                                                                                                                                                                                                                                                                                                                                           | Summary statistics reported                                                                                                                                                                                                                                                                                     |
|-----------------------------------------|---------------------------------------------------------------------------------------------------------------------------------------------------------------------------------------------------------------------------------------------------------------------------------------------------------------------------------------------------------------------------------------------------------------------------------------------------------------------------------------------------------------------------------------------------|-----------------------------------------------------------------------------------------------------------------------------------------------------------------------------------------------------------------------------------------------------------------------------------------------------------------|
|                                         | Filgrastim ( <i>n</i> = 852 cycles): 0.11<br>Pegfilgrastim ( <i>n</i> = 12,218 cycles): 0.11<br><i>Neutropenia-related hospitalization incidents</i><br>Filgrastim ( <i>n</i> = 852 cycles): 0.02<br>Pegfilgrastim ( <i>n</i> = 12,218 cycles): 0.01<br><i>Neutropenia-related ambulatory visits</i><br>Filgrastim ( <i>n</i> = 852 cycles): 1.5<br>Pegfilgrastim ( <i>n</i> = 12,218 cycles): 0.36<br><i>Neutropenia-related emergency room visits</i><br>Filgrastim ( <i>n</i> = 852 cycles): 0<br>Pegfilgrastim ( <i>n</i> = 12,218 cycles): 0 | Filgrastim vs pegfilgrastim, <i>P</i> < 0.01<br><br>Filgrastim vs pegfilgrastim, <i>P</i> < 0.001<br><br>Filgrastim vs pegfilgrastim, risk of neutropenia-related hospitalization, OR (95% CI) 0.33 (0.19–0.58)<br>Filgrastim vs pegfilgrastim, risk of all-cause hospitalization, OR (95% CI) 0.56 (0.43–0.72) |
| Naeim <i>et al.</i> , 2013 [39]         | <b>Outcome, <i>n</i> (%)</b><br><i>Total hospitalization incidents</i><br>Filgrastim ( <i>n</i> = 373 cycles): 38 (10.2)<br>Pegfilgrastim ( <i>n</i> = 11,683 cycles): 582 (5.0)<br><i>Hospitalization due to neutropenia</i><br>Filgrastim ( <i>n</i> = 373 cycles): 5 (1.34)<br>Pegfilgrastim ( <i>n</i> = 11,683 cycles): 68 (0.58)                                                                                                                                                                                                            | Pegfilgrastim vs filgrastim, OR (95% CI) 0.50 (0.35–0.72)<br><br>Pegfilgrastim vs filgrastim, hospitalization due to neutropenia, narrow definition: OR (95% CI) 0.43 (0.16–1.13); broad definition: OR (95% CI) 0.38 (0.24–0.59)                                                                               |
| Salar <i>et al.</i> , 2009 [41]         | <b>Duration of hospitalization due to FN, mean (SD) days</b><br>Filgrastim ( <i>n</i> = NR): 12.4 (11.1)<br>Pegfilgrastim ( <i>n</i> = NR): 5.9 (5.8)                                                                                                                                                                                                                                                                                                                                                                                             | No statistics reported                                                                                                                                                                                                                                                                                          |
| Tan <i>et al.</i> , 2011 [44]           | <b>Hospitalization due to neutropenia, <i>n</i> (%)</b><br>Filgrastim ( <i>n</i> = 231 cycles): 8 (3.5)<br>Pegfilgrastim ( <i>n</i> = 4636 cycles): 51 (1.1)                                                                                                                                                                                                                                                                                                                                                                                      | Filgrastim vs pegfilgrastim, <i>P</i> = 0.001                                                                                                                                                                                                                                                                   |
| von Minckwitz <i>et al.</i> , 2008 [45] | <b>Outcome, <i>n</i> (%)</b><br><i>Total hospitalization incidents</i><br>Daily G-CSF ( <i>n</i> = 2400 cycles): 76 (3)<br>Pegfilgrastim ( <i>n</i> = 1930 cycles): 36 (2)                                                                                                                                                                                                                                                                                                                                                                        | Daily G-CSF vs pegfilgrastim, <i>P</i> < 0.01                                                                                                                                                                                                                                                                   |

| Reference                                                      | Hospitalization outcome                                                              | Summary statistics reported                                                                                                                                                                                                                                                                                 |                                                                  |                                                                                                                                                                                                                                                     |
|----------------------------------------------------------------|--------------------------------------------------------------------------------------|-------------------------------------------------------------------------------------------------------------------------------------------------------------------------------------------------------------------------------------------------------------------------------------------------------------|------------------------------------------------------------------|-----------------------------------------------------------------------------------------------------------------------------------------------------------------------------------------------------------------------------------------------------|
| Wetten <i>et al.</i> , 2015 [47]                               | Pegfilgrastim plus ciprofloxacin ( <i>n</i> = 1890 cycles): 39 (2)                   | Daily G-CSF vs pegfilgrastim + ciprofloxacin,<br><i>P</i> < 0.01                                                                                                                                                                                                                                            |                                                                  |                                                                                                                                                                                                                                                     |
|                                                                | Ciprofloxacin alone ( <i>n</i> = 1478 cycles): 92 (6)                                |                                                                                                                                                                                                                                                                                                             |                                                                  |                                                                                                                                                                                                                                                     |
|                                                                | <i>Hospitalization due to FN</i>                                                     |                                                                                                                                                                                                                                                                                                             |                                                                  |                                                                                                                                                                                                                                                     |
|                                                                | Daily G-CSF ( <i>n</i> = 2400 cycles): 19 (1)                                        |                                                                                                                                                                                                                                                                                                             |                                                                  |                                                                                                                                                                                                                                                     |
|                                                                | Pegfilgrastim ( <i>n</i> = 1930 cycles): 6 (<1)                                      |                                                                                                                                                                                                                                                                                                             |                                                                  |                                                                                                                                                                                                                                                     |
|                                                                | Pegfilgrastim plus ciprofloxacin ( <i>n</i> = 1890 cycles): 7 (<1)                   |                                                                                                                                                                                                                                                                                                             |                                                                  |                                                                                                                                                                                                                                                     |
|                                                                | Ciprofloxacin alone ( <i>n</i> = 1478 cycles): 21 (1)                                |                                                                                                                                                                                                                                                                                                             |                                                                  |                                                                                                                                                                                                                                                     |
|                                                                | <i>Hospitalization due to neutropenia</i>                                            |                                                                                                                                                                                                                                                                                                             |                                                                  |                                                                                                                                                                                                                                                     |
|                                                                | Daily G-CSF ( <i>n</i> = 2400 cycles): 30 (1)                                        |                                                                                                                                                                                                                                                                                                             |                                                                  |                                                                                                                                                                                                                                                     |
|                                                                | Pegfilgrastim ( <i>n</i> = 1930 cycles): 11 (1)                                      |                                                                                                                                                                                                                                                                                                             |                                                                  |                                                                                                                                                                                                                                                     |
|                                                                | Pegfilgrastim plus ciprofloxacin ( <i>n</i> = 1890 cycles): 9 (<1)                   |                                                                                                                                                                                                                                                                                                             |                                                                  |                                                                                                                                                                                                                                                     |
|                                                                | Ciprofloxacin alone ( <i>n</i> = 1478 cycles): 44 (3)                                |                                                                                                                                                                                                                                                                                                             |                                                                  |                                                                                                                                                                                                                                                     |
|                                                                | <i>Hospitalization due to infection</i>                                              |                                                                                                                                                                                                                                                                                                             |                                                                  |                                                                                                                                                                                                                                                     |
|                                                                | Daily G-CSF ( <i>n</i> = 2400 cycles): 15 (1)                                        |                                                                                                                                                                                                                                                                                                             |                                                                  |                                                                                                                                                                                                                                                     |
|                                                                | Pegfilgrastim ( <i>n</i> = 1930 cycles): 10 (1)                                      |                                                                                                                                                                                                                                                                                                             |                                                                  |                                                                                                                                                                                                                                                     |
|                                                                | Pegfilgrastim plus ciprofloxacin ( <i>n</i> = 1890 cycles): 10 (1)                   |                                                                                                                                                                                                                                                                                                             |                                                                  |                                                                                                                                                                                                                                                     |
|                                                                | Ciprofloxacin alone ( <i>n</i> = 1478 cycles): 12 (1)                                |                                                                                                                                                                                                                                                                                                             |                                                                  |                                                                                                                                                                                                                                                     |
|                                                                | Wetten <i>et al.</i> , 2015 [47]                                                     |                                                                                                                                                                                                                                                                                                             | <b>Outcome (Individual data not reported)</b>                    | Prophylactic daily G-CSF vs prophylactic<br>pegfilgrastim, adjusted OR (95% CI) 2.19<br>(1.41–3.39),<br><i>P</i> < 0.001<br>Prophylactic daily G-CSF vs prophylactic<br>pegfilgrastim, adjusted OR (95% CI) 1.63<br>(1.11–2.40),<br><i>P</i> = 0.01 |
|                                                                |                                                                                      |                                                                                                                                                                                                                                                                                                             | <i>Risk of FN-related hospitalizations (“narrow” definition)</i> |                                                                                                                                                                                                                                                     |
| <i>Risk of FN-related hospitalization (“broad” definition)</i> |                                                                                      |                                                                                                                                                                                                                                                                                                             |                                                                  |                                                                                                                                                                                                                                                     |
| Weycker <i>et al.</i> , 2009 [48]                              | <b>Outcome, %</b>                                                                    | Filgrastim vs pegfilgrastim, unadjusted OR<br>(95% CI) 1.53 (1.07–2.17), <i>P</i> = 0.019;<br>adjusted OR (95% CI) 1.61 (1.06–2.44), <i>P</i> =<br>0.026<br>Filgrastim vs pegfilgrastim, unadjusted OR<br>(95% CI) 1.32 (1.05–1.66), <i>p</i> = 0.020;<br>adjusted OR (95% CI) 1.39 (1.05–1.83), <i>P</i> = |                                                                  |                                                                                                                                                                                                                                                     |
|                                                                | <i>Risk of neutropenia-related hospitalization (“narrow” definition<sup>a</sup>)</i> |                                                                                                                                                                                                                                                                                                             |                                                                  |                                                                                                                                                                                                                                                     |
|                                                                | Filgrastim ( <i>n</i> = 2704): 1.4                                                   |                                                                                                                                                                                                                                                                                                             |                                                                  |                                                                                                                                                                                                                                                     |
|                                                                | Pegfilgrastim ( <i>n</i> = 18,361): 0.9                                              |                                                                                                                                                                                                                                                                                                             |                                                                  |                                                                                                                                                                                                                                                     |
|                                                                | Sargramostim ( <i>n</i> = 495): 3.0                                                  |                                                                                                                                                                                                                                                                                                             |                                                                  |                                                                                                                                                                                                                                                     |
|                                                                | <i>Risk of neutropenia-related hospitalization (“broad” definition<sup>a</sup>)</i>  |                                                                                                                                                                                                                                                                                                             |                                                                  |                                                                                                                                                                                                                                                     |
| Filgrastim ( <i>n</i> = 2704): 3.3                             |                                                                                      |                                                                                                                                                                                                                                                                                                             |                                                                  |                                                                                                                                                                                                                                                     |
| Pegfilgrastim ( <i>n</i> = 18,361): 2.5                        |                                                                                      |                                                                                                                                                                                                                                                                                                             |                                                                  |                                                                                                                                                                                                                                                     |

G-CSFs for chemotherapy-induced febrile neutropenia

| Reference                                              | Hospitalization outcome                                                            | Summary statistics reported                                                             |
|--------------------------------------------------------|------------------------------------------------------------------------------------|-----------------------------------------------------------------------------------------|
| Weycker <i>et al.</i> , 2012 [49]                      | Sargramostim ( <i>n</i> = 495): 5.5                                                | 0.023                                                                                   |
|                                                        | <i>Risk of all-cause hospitalization</i>                                           | Filgrastim vs pegfilgrastim, unadjusted OR (95% CI) 1.29 (1.09–1.52), <i>P</i> = 0.003; |
|                                                        | Filgrastim ( <i>n</i> = 2704): 6.6                                                 | adjusted OR (95% CI) 1.34 (1.09–1.65), <i>P</i> = 0.006                                 |
|                                                        | Pegfilgrastim ( <i>n</i> = 18,361): 5.2                                            |                                                                                         |
|                                                        | Sargramostim ( <i>n</i> = 495): 10.3                                               |                                                                                         |
|                                                        | <b>Outcome, <i>n</i> (%)</b>                                                       |                                                                                         |
|                                                        | <i>Risk of neutropenia-related hospitalization (narrow definition<sup>a</sup>)</i> | Filgrastim vs pegfilgrastim, OR (95% CI) 1.93 (1.63–2.28), <i>P</i> < 0.001             |
|                                                        | Filgrastim ( <i>n</i> = 8286 cycles): 170 (2.1)                                    |                                                                                         |
|                                                        | Pegfilgrastim ( <i>n</i> = 67,247 cycles): 723 (1.1)                               |                                                                                         |
|                                                        | Sargramostim ( <i>n</i> = 1736 cycles): 44 (2.5)                                   |                                                                                         |
|                                                        | <i>Risk of neutropenia-related hospitalization (broad definition<sup>a</sup>)</i>  | Filgrastim vs pegfilgrastim, OR (95% CI) 1.53 (1.35–1.72), <i>P</i> < 0.001             |
|                                                        | Filgrastim ( <i>n</i> = 8286 cycles): 328 (4.0)                                    |                                                                                         |
|                                                        | Pegfilgrastim ( <i>n</i> = 67,247 cycles): 1768 (2.6)                              |                                                                                         |
| Sargramostim ( <i>n</i> = 1736 cycles): 88 (5.1)       |                                                                                    |                                                                                         |
| <i>Risk of all-cause hospitalization</i>               | Filgrastim vs pegfilgrastim, OR (95% CI) 1.55 (1.42–1.69), <i>P</i> < 0.001        |                                                                                         |
| Filgrastim ( <i>n</i> = 8286 cycles): 658 (7.9)        |                                                                                    |                                                                                         |
| Pegfilgrastim ( <i>n</i> = 67,247 cycles): 3,553 (5.3) |                                                                                    |                                                                                         |
| Sargramostim ( <i>n</i> = 1736 cycles): 167 (9.6)      |                                                                                    |                                                                                         |

*AE* adverse event, *CI* confidence interval, *FN* febrile neutropenia, *G-CSF* granulocyte colony-stimulating factor, *HIRD* HealthCare Integrated Research Database, *ICD-9-CM* The International Classification of Diseases, Ninth Revision, Clinical Modification, *non-RCT* nonrandomized controlled trial, *NR* not reported, *OR* odds ratio, *RCT* randomized controlled trial

<sup>a</sup> The incidence of hospitalization for neutropenic complications was assessed using 2 alternative criteria: a “narrow” definition was admission to hospital with a principal or secondary diagnosis of neutropenia (ICD-9-CM 288.0), a “broad” definition was admission to hospital with a principal or secondary diagnosis of neutropenia, fever (ICD-9-CM 780.6) or infection

**Supplementary Appendix Table S10** Short- vs long-acting G-CSFs for the reduction of chemotherapy-induced FN: Summary of chemotherapy dose reductions or delays

| Reference                                 | Incidence of dose reduction or delay                                                                                                                                                                                                                                                                                                                                                                                                                                                                                                                                             | Summary statistics reported                                                                                                      |
|-------------------------------------------|----------------------------------------------------------------------------------------------------------------------------------------------------------------------------------------------------------------------------------------------------------------------------------------------------------------------------------------------------------------------------------------------------------------------------------------------------------------------------------------------------------------------------------------------------------------------------------|----------------------------------------------------------------------------------------------------------------------------------|
| <b>RCT</b>                                |                                                                                                                                                                                                                                                                                                                                                                                                                                                                                                                                                                                  |                                                                                                                                  |
| Bozzoli <i>et al.</i> , 2015 [1]          | <b>Median dose intensity, %</b><br>Filgrastim ( <i>n</i> = 24): 87.5<br>Pegfilgrastim ( <i>n</i> = 27): 89.4<br><b>Significant reduction to a dose intensity &lt;80%, <i>n</i> (%)</b><br>Filgrastim ( <i>n</i> = 24): 5 (20.8)<br>Pegfilgrastim ( <i>n</i> = 27): 7 (26.9)                                                                                                                                                                                                                                                                                                      | Filgrastim vs pegfilgrastim, <i>P</i> = 0.9                                                                                      |
| Green <i>et al.</i> , 2003 [4]            | <b>Dose reduction</b><br>Filgrastim ( <i>n</i> = 75)<br>Pegfilgrastim ( <i>n</i> = 77)                                                                                                                                                                                                                                                                                                                                                                                                                                                                                           | Total chemotherapy dose administered in each group was similar, with ~5% of patients having >25% dose reduction in any cycle     |
| Grigg <i>et al.</i> , 2003 [5]            | <b>Full dose of chemotherapy delivered, %</b><br>Filgrastim ( <i>n</i> = 59 cycles): 94<br>Pegfilgrastim, 60 µg/kg ( <i>n</i> = 68 cycles): 96<br>Pegfilgrastim, 100 µg/kg ( <i>n</i> = 62 cycles): 100                                                                                                                                                                                                                                                                                                                                                                          | In cycles 2–6, 8 patients developed a delay in the start of chemotherapy of >3 days; no delays were related to neutropenia       |
| Lopez <i>et al.</i> , 2005 [6]            | <b>&gt;75% of the planned dose delivered, %</b><br>Filgrastim ( <i>n</i> = 145 cycles): 100<br>Pegfilgrastim ( <i>n</i> = 188 cycles): 97<br><b>Chemotherapy delivered on time, %</b><br>Filgrastim ( <i>n</i> = 145 cycles): 94<br>Pegfilgrastim ( <i>n</i> = 188 cycles): 96<br><b>Planned doses of chemotherapy delivered on time, % (95% CI)</b><br>Filgrastim ( <i>n</i> = 26): 81 (61–93)<br>Pegfilgrastim ( <i>n</i> = 32): 69 (50–84)<br><b>Dose delays, <i>n</i> (%)</b><br>Filgrastim ( <i>n</i> = 145 cycles): 7 (5)<br>Pegfilgrastim ( <i>n</i> = 188 cycles): 0 (0) | Pegfilgrastim is safe and well tolerated, having a safety profile similar to that of daily filgrastim in this patient population |
| <b>Non-RCT</b>                            |                                                                                                                                                                                                                                                                                                                                                                                                                                                                                                                                                                                  |                                                                                                                                  |
| Almenar Cubells <i>et al.</i> , 2013 [19] | <b>Dose delay, <i>n</i> (%)</b><br>Daily G-CSF ( <i>n</i> = 211): 111 (54.7)<br>Pegfilgrastim ( <i>n</i> = 180): 70 (41.7)                                                                                                                                                                                                                                                                                                                                                                                                                                                       | Daily G-CSF vs pegfilgrastim, <i>P</i> = 0.013                                                                                   |

| Reference                         | Incidence of dose reduction or delay                                                                                                                                                       | Summary statistics reported                                                                                                                                                                                                                                                                  |              |
|-----------------------------------|--------------------------------------------------------------------------------------------------------------------------------------------------------------------------------------------|----------------------------------------------------------------------------------------------------------------------------------------------------------------------------------------------------------------------------------------------------------------------------------------------|--------------|
| Almenar <i>et al.</i> , 2009 [20] | <b>Dose reduction, <i>n</i> (%)</b><br>Daily G-CSF ( <i>n</i> = 211): 78 (38.4)<br>Pegfilgrastim ( <i>n</i> = 180): 53 (31.6)                                                              | Daily G-CSF vs pegfilgrastim, <i>P</i> = 0.116                                                                                                                                                                                                                                               |              |
|                                   | <b>Chemotherapy dose intensity &lt;85%, <i>n</i> (%)</b><br>Daily G-CSF ( <i>n</i> = 211): 82 (39.4)<br>Pegfilgrastim ( <i>n</i> = 180): 52 (28.9)                                         | Daily G-CSF vs pegfilgrastim, <i>P</i> = 0.030                                                                                                                                                                                                                                               |              |
|                                   | <b>Dose reduction, <i>n</i> (%) [95% CI]</b><br>Daily G-CSF ( <i>n</i> = 111): 23 (20.7) [14.2–29.2]<br>Pegfilgrastim ( <i>n</i> = 75): 11 (14.7) [8.2–24.6]                               | Patients who were treated with pegfilgrastim appeared to have a numerically lower incidence of dose reduction due to neutropenia, than those who received daily G-CSF; however, due to the descriptive nature of the analysis in this study, a conclusion of the significance cannot be made |              |
|                                   | <b>Dose reduction due to neutropenia, <i>n</i> (%) [95% CI]</b><br>Daily G-CSF ( <i>n</i> = 111): 23 (20.7) [14.1–29.2]<br>Pegfilgrastim ( <i>n</i> = 75): 5 (6.7) [2.5–15.0]              |                                                                                                                                                                                                                                                                                              |              |
|                                   | <b>Dose delay, <i>n</i> (%) [95% CI]</b><br>Daily G-CSF ( <i>n</i> = 111): 51 (46.0) [36.0–55.0]<br>Pegfilgrastim ( <i>n</i> = 75): 33 (44.0) [33.0–55.0]                                  |                                                                                                                                                                                                                                                                                              |              |
|                                   | <b>Dose reduction due to FN, <i>n</i> (%)</b><br>Reference filgrastim ( <i>n</i> = 147): 1 (1)<br>Biosimilar filgrastim ( <i>n</i> = 134): 1 (1)<br>Pegfilgrastim ( <i>n</i> = 139): 1 (1) |                                                                                                                                                                                                                                                                                              |              |
|                                   | Brito <i>et al.</i> , 2012 [21]; Brito <i>et al.</i> 2016 [22]                                                                                                                             | <b>Dose delay due to FN, <i>n</i> (%)</b><br>Reference filgrastim ( <i>n</i> = 833 cycles): 11 (1)<br>Biosimilar filgrastim ( <i>n</i> = 761 cycles): 16 (2)<br>Pegfilgrastim ( <i>n</i> = 761 cycles): 4 (0.5)                                                                              | Not reported |
|                                   |                                                                                                                                                                                            | <b>Early termination due to FN, <i>n</i> (%)</b><br>Reference filgrastim ( <i>n</i> = 833 cycles): 3 (2)<br>Biosimilar filgrastim ( <i>n</i> = 761 cycles): 1 (1)<br>Pegfilgrastim ( <i>n</i> = 761 cycles): 6 (4)                                                                           |              |
|                                   |                                                                                                                                                                                            | <b>Dose reduction, <i>n</i> (%)</b><br><i>First cycle</i><br>Filgrastim ( <i>n</i> = 81): 4 (4.9)<br>Pegfilgrastim ( <i>n</i> = 123): 4 (3.3)                                                                                                                                                |              |
|                                   |                                                                                                                                                                                            |                                                                                                                                                                                                                                                                                              |              |
| Chan <i>et al.</i> , 2011 [23]    |                                                                                                                                                                                            | Filgrastim vs pegfilgrastim, <i>P</i> = 0.45                                                                                                                                                                                                                                                 |              |

| Reference                                                               | Incidence of dose reduction or delay                                                                                                                                                                                                                                                                                                                                   | Summary statistics reported                                                                                                           |
|-------------------------------------------------------------------------|------------------------------------------------------------------------------------------------------------------------------------------------------------------------------------------------------------------------------------------------------------------------------------------------------------------------------------------------------------------------|---------------------------------------------------------------------------------------------------------------------------------------|
|                                                                         | <i>All cycles</i><br>Filgrastim ( $n = 81$ ): 8 (9.9)<br>Pegfilgrastim ( $n = 123$ ): 13 (10.6)<br><b>Dose delay, <math>n</math> (%)</b><br><i>First cycle</i><br>Filgrastim ( $n = 81$ ): 7 (8.6)<br>Pegfilgrastim ( $n = 123$ ): 7 (5.7)<br><i>All cycles</i><br>Filgrastim ( $n = 81$ ): 14 (16.0)<br>Pegfilgrastim ( $n = 123$ ): 23 (18.7)                        | Filgrastim vs pegfilgrastim, $P = 1.00$<br><br>Filgrastim vs pegfilgrastim, $P = 0.25$<br><br>Filgrastim vs pegfilgrastim, $P = 0.71$ |
| Kourlaba <i>et al.</i> , 2015 [28]                                      | <b>Dose reduction, % (95% CI)</b><br>Filgrastim ( $n = 529$ ): 18.5 (15.3–22.1)<br>Pegfilgrastim ( $n = 529$ ): 10.8 (8.3–13.7)<br><b>Dose delay &gt;2 days, % (95% CI)</b><br>Filgrastim ( $n = 529$ ): 42.0 (37.7–46.3)<br>Pegfilgrastim ( $n = 529$ ): 27.6 (23.8–31.6)                                                                                             | Filgrastim vs pegfilgrastim, $P < 0.001$<br><br>Filgrastim vs pegfilgrastim, $P < 0.001$                                              |
| Leonard <i>et al.</i> , 2009 [30];<br>Leonard <i>et al.</i> , 2015 [31] | <b>Relative dose intensity of <math>\geq 85\%</math>, %</b><br>Filgrastim ( $n = 129$ ): 69.5<br>Pegfilgrastim ( $n = 75$ ): 84.9                                                                                                                                                                                                                                      | No statistics reported (study was not designed to test any differences in outcome between short- vs long-acting G-CSFs)               |
| Leung <i>et al.</i> , 2015 [33]                                         | <b>Dose reduction, cycle 2, <math>n</math></b><br>Filgrastim ( $n = 48$ ): 8<br>Pegfilgrastim ( $n = 94$ ): 8<br><b>Dose delay, cycle 2, <math>n</math></b><br>Filgrastim ( $n = 48$ ): 5<br>Pegfilgrastim ( $n = 94$ ): 7<br><b>Dose delay due to neutropenia, cycle 2, <math>n</math> (%)</b><br>Filgrastim ( $n = 48$ ): 2 (4)<br>Pegfilgrastim ( $n = 94$ ): 0 (0) | Filgrastim vs pegfilgrastim, $P = 0.17$<br><br>Filgrastim vs pegfilgrastim, $P = 0.5$<br><br>Filgrastim vs pegfilgrastim, $P = 0.12$  |
| Salar <i>et al.</i> , 2009 [41]                                         | <b>Received full dose on schedule, %</b><br>Daily G-CSF ( $n = \text{NR}$ ): 61.2                                                                                                                                                                                                                                                                                      | No statistics reported                                                                                                                |

G-CSFs for chemotherapy-induced febrile neutropenia

| Reference                               | Incidence of dose reduction or delay                                                                                                                                                                                                         | Summary statistics reported                                |
|-----------------------------------------|----------------------------------------------------------------------------------------------------------------------------------------------------------------------------------------------------------------------------------------------|------------------------------------------------------------|
| Skarlos <i>et al.</i> , 2009 [43]       | Pegfilgrastim ( <i>n</i> = NR): 72.1<br><b>Dose reductions, <i>n</i> (%)</b><br>Daily G-CSF ( <i>n</i> = 107): 25 (23)<br>Pegfilgrastim ( <i>n</i> = 107): 25 (23)                                                                           | <i>P</i> = 1.00                                            |
|                                         | <b>Dose delays &gt;2 days, <i>n</i> (%)</b><br>Daily G-CSF ( <i>n</i> = 107): 65 (61)<br>Pegfilgrastim ( <i>n</i> = 107): 61 (57)                                                                                                            | <i>P</i> = 0.65                                            |
| von Minckwitz <i>et al.</i> , 2008 [45] | <b>Dose reduction, %</b><br>Daily G-CSF ( <i>n</i> = 2400 cycles): 2–3<br>Pegfilgrastim ( <i>n</i> = 1930 cycles): 2–3<br>Pegfilgrastim + ciprofloxacin ( <i>n</i> = 1890 cycles): 2–3<br>Ciprofloxacin alone ( <i>n</i> = 1478 cycles): 2–3 | Chemotherapy dose reductions were similar in all 4 cohorts |

*CI* confidence interval, *FN* febrile neutropenia, *G-CSF* granulocyte colony-stimulating factor, *non-RCT* non-randomized controlled trial, *RCT* randomized controlled trial

## References

1. Bozzoli V, Tisi MC, Maiolo E, Alma E, Bellesi S, D'Alo F, *et al.* Four doses of unpegylated versus one dose of pegylated filgrastim as supportive therapy in R-CHOP-14 for elderly patients with diffuse large B-cell lymphoma. *Br J Haematol.* 2015;169:787–94.
2. Filon O, Nechaeva M, Burdaeva O, Vladimirov VI, Lifirenko I, Kovalenko NV, *et al.* Efficacy and safety of empegfilgrastim, a novel pegylated G-CSF: results of complete analysis after 4 cycles of myelosuppressive chemotherapy in phase III double-dummy randomized clinical study. *J Clin Oncol.* 2015;33:e20735–e35.
3. Nechaeva MN, Burdaeva ON, Vladimirov VI, Lifirenko ID, Kovalenko NV, Kopp MV, *et al.* Efficacy and safety of empegfilgrastim, a novel pegylated G-CSF: results of double-dummy phase III study in patients receiving myelosuppressive chemotherapy. *Support Care Cancer.* 2015;23:S163–S64.
4. Green MD, Koelbl H, Baselga J, Galid A, Guillem V, Gascon P, *et al.* A randomized double-blind multicenter phase III study of fixed-dose single-administration pegfilgrastim versus daily filgrastim in patients receiving myelosuppressive chemotherapy. *Ann Oncol.* 2003;14:29–35.
5. Grigg A, Solal-Celigny P, Hoskin P, Taylor K, McMillan A, Forstpointner R, *et al.* Open-label, randomized study of pegfilgrastim vs daily filgrastim as an adjunct to chemotherapy in elderly patients with non-Hodgkin's lymphoma. *Leuk Lymphoma.* 2003;44:1503–8.
6. Lopez A, de Sevilla AF, Castaigne S, Greil R, Sierra J, Sanchez J, *et al.* Pegfilgrastim supports delivery of CHO-R chemotherapy administered every 14 days: A randomized phase II study. *J Support Oncol.* 2005;3:46–47.
7. Park KH, Sohn JH, Lee S, Park JH, Kang SY, Kim HY, *et al.* A randomized, multi-center, open-label, phase II study of once-per-cycle DA-3031, a biosimilar pegylated G-CSF, compared with daily filgrastim in patients receiving TAC chemotherapy for early-stage breast cancer. *Invest New Drugs.* 2013;31:1300–6.
8. Ramkumar A, Nimmagadda R, Nirni SS, Aidris T, Anand A. A randomized, multi centre, open-label study to evaluate the efficacy and safety of Peg G-CSF as compared to grafeel in the prophylaxis of severe neutropenia in cancer patients receiving cytotoxic chemotherapy. *Indian J Hematol Blood Transfusion.* 2013;29:388.
9. Salafet OV, Chernovskaya TV, Sheveleva LP, Khorinko AV, Prokopenko TI, Nechaeva MP, *et al.* Efficacy and safety of BCD-017, a novel pegylated filgrastim: results of open-label controlled phase II study in patients with breast cancer receiving myelosuppressive chemotherapy. *J Clin Oncol.* 2013;31:e20593–e93.
10. Satheesh CT, Tejinder S, Ankit J, Sajeevan KV, Lakshmaiah KC, Lokanatha D, *et al.* To analyze efficacy and safety of pegfilgrastim versus filgrastim in patients with breast cancer. *J Clin Oncol.* 2009;27:e20587–e87.
11. Shi YK, He XH, Yang S, Wang HQ, Jiang ZF, Zhu YZ, *et al.* [Treatment of chemotherapy-induced neutropenia pegylated recombinant human granulocyte colony-stimulating factor: a multi-center randomized controlled phase II clinical study]. *Zhonghua Yi Xue Za Zhi.* 2006;86:3414–9.
12. Shi YK, Chen Q, Zhu YZ, He XH, Wang HQ, Jiang ZF, *et al.* Pegylated filgrastim is comparable with filgrastim as support for commonly used chemotherapy regimens: a multicenter, randomized, crossover phase 3 study. *Anticancer Drugs.* 2013;24:641–7.
13. Sierra J, Szer J, Kassis J, Herrmann R, Lazzarino M, Thomas X, *et al.* A single dose of pegfilgrastim compared with daily filgrastim for supporting neutrophil recovery in patients treated for low-to-intermediate risk acute myeloid leukemia: results from a randomized, double-blind, phase 2 trial. *BMC Cancer.* 2008;8:195.
14. Vose JM, Crump M, Lazarus H, Emmanouilides C, Schenkein D, Moore J, *et al.* Randomized, multicenter, open-label study of pegfilgrastim compared with daily filgrastim after chemotherapy for lymphoma. *J Clin Oncol.* 2003;21:514–9.



## G-CSFs for chemotherapy-induced febrile neutropenia

15. Zhang W, Jiang Z, Wang L, Li C, Xia J. An open-label, randomized, multicenter dose-finding study of once-per-cycle pegfilgrastim versus daily filgrastim in Chinese breast cancer patients receiving TAC chemotherapy. *Med Oncol*. 2015;32:147.
16. Zhang M, Lan HT, Chen L. Clinical observation of pegylated recombinant human granulocyte colony-stimulating factor in preventing chemotherapy-induced neutropenia [Chinese]. *Chin J New Drugs*. 2014;23:815–18.
17. Zhou S, Wang H, Zhang H, Qiu L, Qian Z, Li W, *et al*. [A randomized controlled clinical study of pegylated recombinant human granulocyte colony-stimulating factor in chemotherapy-induced neutropenia]. *Chin J Clin Oncol*. 2011;38:1154–58.
18. Zhou SY, Shi YK, Gui L, Han XH, Wang L, Zhang CL, *et al*. [A randomized, open-label, single-dose, self-controlled, dose-escalation phase I study of Y-pegylated recombinant human granulocyte-colony stimulating factor]. *Chin J New Drugs*. 2013;22:928–36.
19. Almenar Cubells D, Bosch Roig C, Jimenez Orozco E, Alvarez R, Cuervo JM, Diaz Fernandez N, *et al*. Effectiveness of daily versus non-daily granulocyte colony-stimulating factors in patients with solid tumours undergoing chemotherapy: a multivariate analysis of data from current practice. *Eur J Cancer Care (Engl)*. 2013;22:400–12.
20. Almenar D, Mayans J, Juan O, Bueno JM, Lopez JI, Frau A, *et al*. Pegfilgrastim and daily granulocyte colony-stimulating factor: patterns of use and neutropenia-related outcomes in cancer patients in Spain--results of the LEARN Study. *Eur J Cancer Care (Engl)*. 2009;18:280–6.
21. Brito M, Esteves S, Andre R, Isidoro M, Moreira A. Abstract P1-15-03. Comparison of efficacy of primary prophylaxis with pegfilgrastim, filgrastim and a biosimilar filgrastim in TAC regimen (docetaxel, doxorubicin and cyclophosphamide). *Cancer Research*. 2012;72:P1-15-03–P1-15-03.
22. Brito M, Esteves S, Andre R, Isidoro M, Moreira A. Comparison of effectiveness of biosimilar filgrastim (Nivestim), reference Amgen filgrastim and pegfilgrastim in febrile neutropenia primary prevention in breast cancer patients treated with neo(adjuvant) TAC: a non-interventional cohort study. *Support Care Cancer*. 2016;24:597–603.
23. Chan A, Leng XZ, Chiang JY, Tao M, Quek R, Tay K, *et al*. Comparison of daily filgrastim and pegfilgrastim to prevent febrile neutropenia in Asian lymphoma patients. *Asia Pac J Clin Oncol*. 2011;7:75–81.
24. Hadji P, Kostev K, Schroder-Bernhardi D, Ziller V. Cost comparison of outpatient treatment with granulocyte colony-stimulating factors (G-CSF) in Germany. *Int J Clin Pharmacol Ther*. 2012;50:281–9.
25. Heaney ML, Toy EL, Vekeman F, Laliberte F, Dority BL, Perlman D, *et al*. Comparison of hospitalization risk and associated costs among patients receiving sargramostim, filgrastim, and pegfilgrastim for chemotherapy-induced neutropenia. *Cancer*. 2009;115:4839–48.
26. Henk HJ, Becker L, Tan H, Yu J, Kavati A, Naeim A, *et al*. Comparative effectiveness of pegfilgrastim, filgrastim, and sargramostim prophylaxis for neutropenia-related hospitalization: two US retrospective claims analyses. *J Med Econ*. 2013;16:160–8.
27. Hershman D, Hurley D, Wong M, Morrison VA, Malin JL. Impact of primary prophylaxis on febrile neutropenia within community practices in the US. *J Med Econ*. 2009;12:203–10.
28. Kourlaba G, Dimopoulos MA, Pectasides D, Skarlos DV, Gogas H, Pentheroudakis G, *et al*. Comparison of filgrastim and pegfilgrastim to prevent neutropenia and maintain dose intensity of adjuvant chemotherapy in patients with breast cancer. *Support Care Cancer*. 2015;23:2045–51.
29. Kubista E, Glaspy J, Holmes FA, Green MD, Hackett J, Neumann T, *et al*. Bone pain associated with once-per-cycle pegfilgrastim is similar to daily filgrastim in patients with breast cancer. *Clin Breast Cancer*. 2003;3:391–8.
30. Leonard RCF, Mansi J, Benstead K, Stewart G, Yellowlees A, Adamson D, *et al*. 5033 Secondary PROphylaxis with G-CSF has a major effect on delivered dose intensity: the results of the UK NCRI/Anglo Celtic SPROG trial for adjuvant chemotherapy of breast cancer. *EJC Suppl*. 2009;7:271.

## G-CSFs for chemotherapy-induced febrile neutropenia

31. Leonard RC, Mansi JL, Keerie C, Yellowlees A, Crawford S, Benstead K, *et al.* A randomised trial of secondary prophylaxis using granulocyte colony-stimulating factor ('SPROG' trial) for maintaining dose intensity of standard adjuvant chemotherapy for breast cancer by the Anglo-Celtic Cooperative Group and NCRN. *Ann Oncol.* 2015;26:2437–41.
32. Leung M, Eustaquio J, Kano J, Marr T, Higgins BP, Myers RE, *et al.* Pain severity and impairment of activity between pegfilgrastim (P) and fixed-dose filgrastim (F) in women with early-stage breast cancer receiving chemotherapy. *J Clin Oncol.* 2012;30:e19570–e70.
33. Leung M, Florendo J, Kano J, Marr-Del Monte T, Higgins B, Myers R, *et al.* A modified filgrastim regimen does not reduce pain burden compared to pegfilgrastim in women receiving chemotherapy for non-metastatic breast cancer. *Support Care Cancer.* 2015;23:1669–77.
34. Marina J, Carabantes FJ, Escrivá de Romani S, Pernas S, Cantos B, Carañana V, *et al.* 3019 Current practice of prophylaxis with granulocyte colony-stimulating factors for preventing chemotherapy-induced neutropenia in breast cancer patients in Spain. *Eur J Cancer Suppl.* 2009;7:181.
35. Mates MM, Hopman W, Altwairgi AK. Review of practice patterns of primary granulocyte-colony stimulating factor prophylaxis and impact on febrile neutropenia rate and chemotherapy delivery in patients with early breast cancer treated with modern adjuvant chemotherapy. *J Clin Oncol.* 2012;30:e19541–e41.
36. Mazo EM, Gil-Fernandez JJ, Garcia Suarez J, Callejas Charavia M, Guerrero YM, Pascual Garcia T, *et al.* Comparative effect of filgrastim vs pegfilgrastim after chemotherapy on high grade non hodgkin lymphoma. *Haematologica.* 2009;94:231.
37. Morrison VA, Wong M, Hershman D, Campos LT, Ding B, Malin J. Observational study of the prevalence of febrile neutropenia in patients who received filgrastim or pegfilgrastim associated with 3-4 week chemotherapy regimens in community oncology practices. *J Manag Care Pharm.* 2007;13:337–48.
38. Naeim A, Henk HJ, Becker L, Chia V, Badre S, Deeter RG. Pegfilgrastim use associated with lower risk of hospitalization than filgrastim use: a retrospective US claims analysis. *Blood.* 2010;116:3801–01.
39. Naeim A, Henk HJ, Becker L, Chia V, Badre S, Li X, *et al.* Pegfilgrastim prophylaxis is associated with a lower risk of hospitalization of cancer patients than filgrastim prophylaxis: a retrospective United States claims analysis of granulocyte colony-stimulating factors (G-CSF). *BMC Cancer.* 2013;13:11.
40. Phillips J, Ritter S, Starner CI, Gleason PP. Filgrastim (Neupogen) and pegfilgrastim (Neulasta): cost analysis and utilization management opportunity assessment. *J Manag Care Pharm.* 2012;18:176–77.
41. Salar A, Lopez A, Pio Torres J, Lopez MD, Caballero MD, Prieto E, *et al.* Incidence of chemotherapy-induced neutropenia in Lymphoma patients and use of prophylaxis with granulocyte colony-stimulating factors in clinical practice. *Haematologica.* 2009;94:521.
42. Schippinger W, Holub R, Dandachi N, Bauernhofer T, Samonigg H. Frequency of febrile neutropenia in breast cancer patients receiving epirubicin and docetaxel/paclitaxel with colony-stimulating growth factors: a comparison of filgrastim or lenograstim with pegfilgrastim. *Oncology.* 2006;70:290–3.
43. Skarlos DV, Timotheadou E, Galani E, Samantas E, Grimani I, Lianos E, *et al.* Pegfilgrastim administered on the same day with dose-dense adjuvant chemotherapy for breast cancer is associated with a higher incidence of febrile neutropenia as compared to conventional growth factor support: matched case-control study of the Hellenic Cooperative Oncology Group. *Oncology.* 2009;77:107–12.
44. Tan H, Tomic K, Hurley D, Daniel G, Barron R, Malin J. Comparative effectiveness of colony-stimulating factors for febrile neutropenia: a retrospective study. *Curr Med Res Opin.* 2011;27:79–86.

## G-CSFs for chemotherapy-induced febrile neutropenia

45. von Minckwitz G, Kummel S, du Bois A, Eiermann W, Eidtmann H, Gerber B, *et al.* Pegfilgrastim +/- ciprofloxacin for primary prophylaxis with TAC (docetaxel/doxorubicin/cyclophosphamide) chemotherapy for breast cancer. Results from the GEPARTRIO study. *Ann Oncol.* 2008;19:292–8.
46. von Minckwitz G, Kummel S, Vogel P, Hanusch C, Eidtmann H, Hilfrich J, *et al.* Intensified neoadjuvant chemotherapy in early-responding breast cancer: phase III randomized GeparTrio study. *J Natl Cancer Inst.* 2008;100:552–62.
47. Wetten S, Li X, Haas J, Worth G, Jacob C, Braun S, *et al.* Comparative effectiveness of granulocyte colony-stimulating factors (G-CSF) for reducing incidence of febrile neutropenia (Fn) -related hospitalization: a retrospective cohort study using German claims data. *Value Health.* 2015;18:A434.
48. Weycker D, Barron RL, Kartashov A, Oster G. Comparative effectiveness of pegfilgrastim, filgrastim, and sargramostim as prophylaxis against hospitalization for febrile neutropenia in cancer chemotherapy patients. *J Manag Care Pharm.* 2009;15:576–77.
49. Weycker D, Malin J, Barron R, Edelsberg J, Kartashov A, Oster G. Comparative effectiveness of filgrastim, pegfilgrastim, and sargramostim as prophylaxis against hospitalization for neutropenic complications in patients with cancer receiving chemotherapy. *Am J Clin Oncol.* 2012;35:267–74.

**Supplementary Appendix Fig. 1. PRISMA flow diagram**

i Initial screen conducted in August 2015

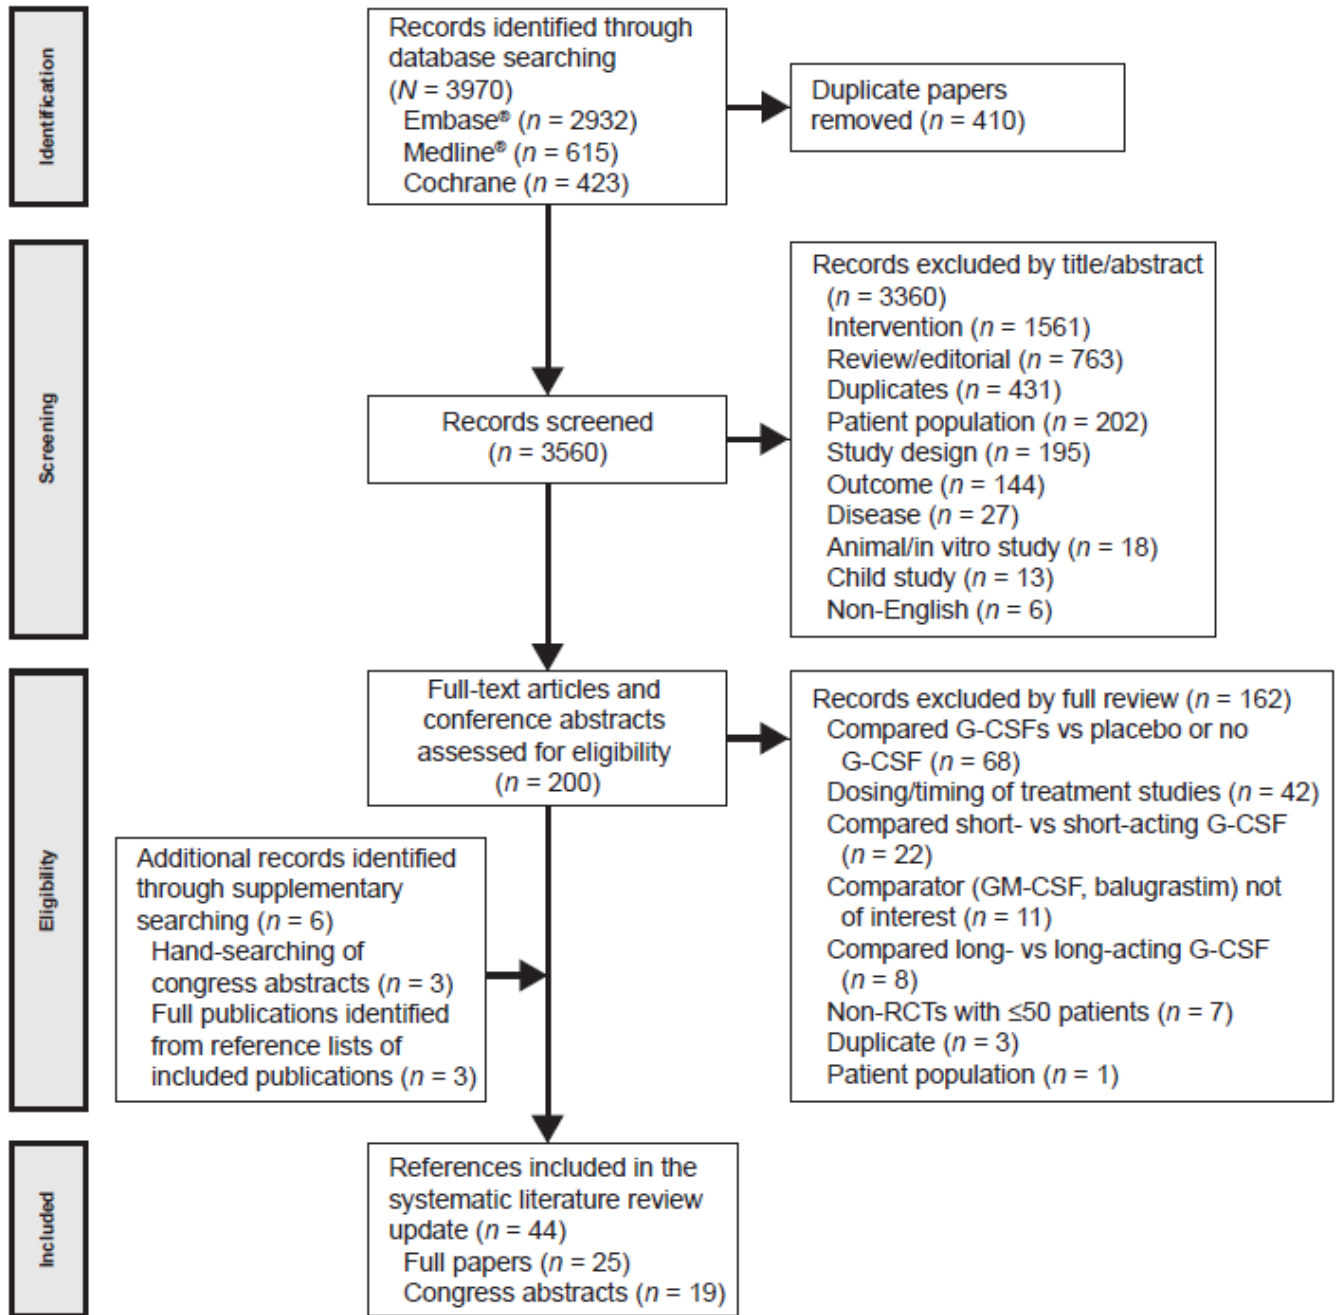

ii Refresher screen conducted in June 2016

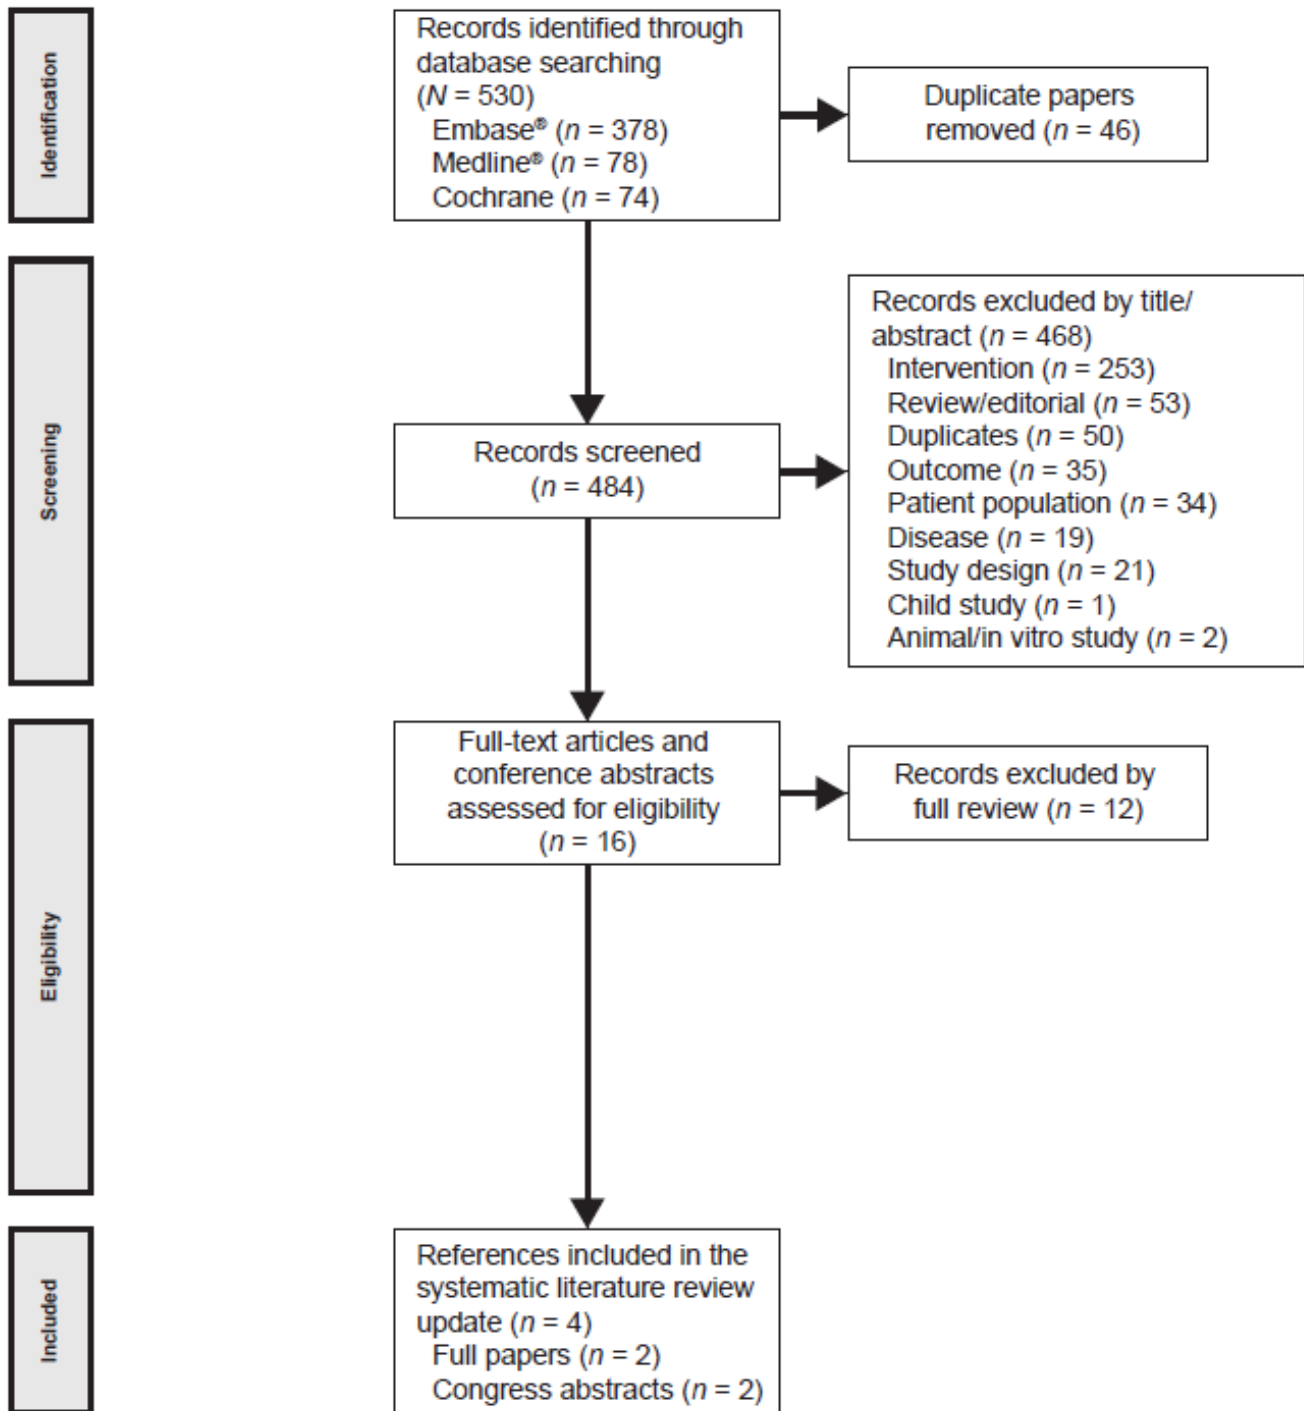

G-CSF granulocyte colony-stimulating factor, GM-CSF granulocyte-macrophage colony-stimulating factor, non-RCT non-randomized controlled trial.

**Supplementary Appendix Fig. 2.** Meta-analysis to investigate the effect of short- vs long-acting G-CSFs on the incidence of FN in non-RCTs using a random-effect model.<sup>a</sup>

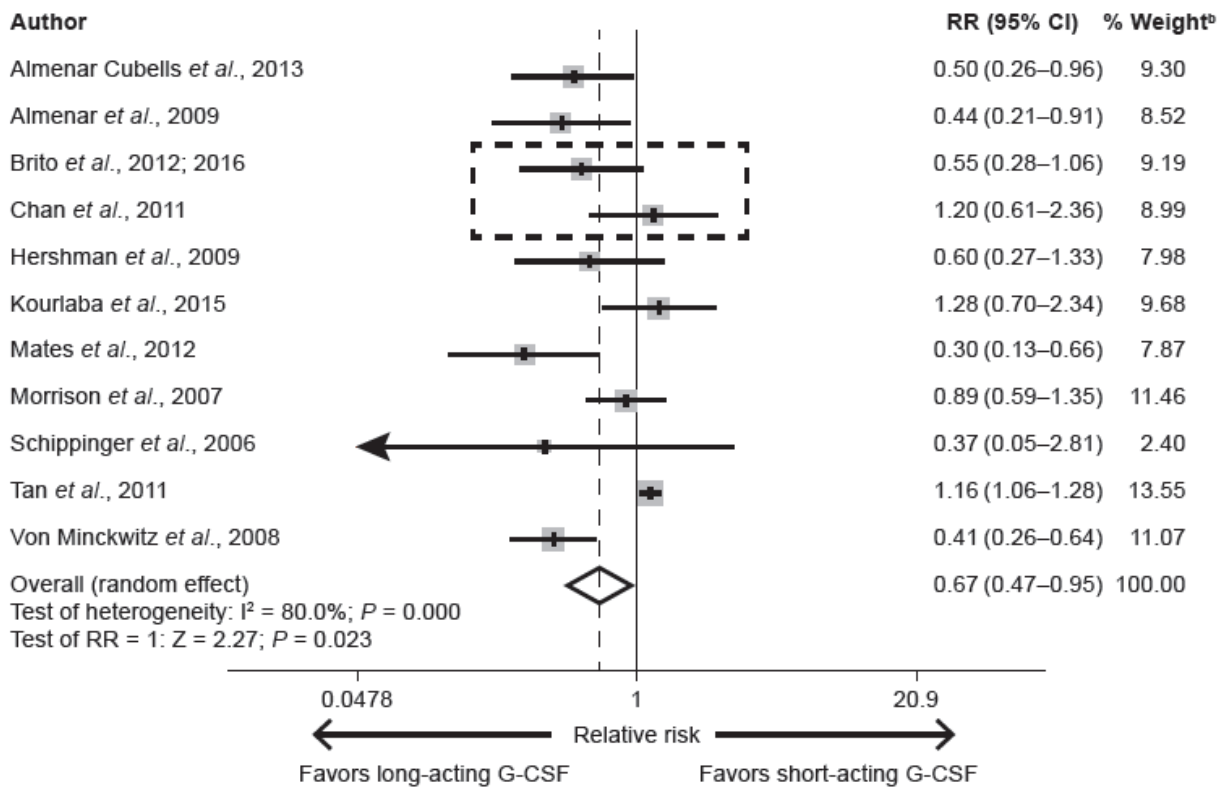

<sup>a</sup>The dotted square shows studies in which G-CSF administration adhered to label recommendations ( $\geq 7$  days of treatment). <sup>b</sup>Weights are from random-effect analysis. *CI* confidence interval, *FN* febrile neutropenia, *G-CSF* granulocyte colony-stimulating factor,  $I^2$  chi-squared, *RCT* randomized controlled trial, *RR* relative risk.

**Supplementary Appendix Fig. 3.** Meta-analysis to investigate the effect of short- vs long-acting G-CSFs on chemotherapy dose delays in non-RCTs using a random-effect model.<sup>a</sup>

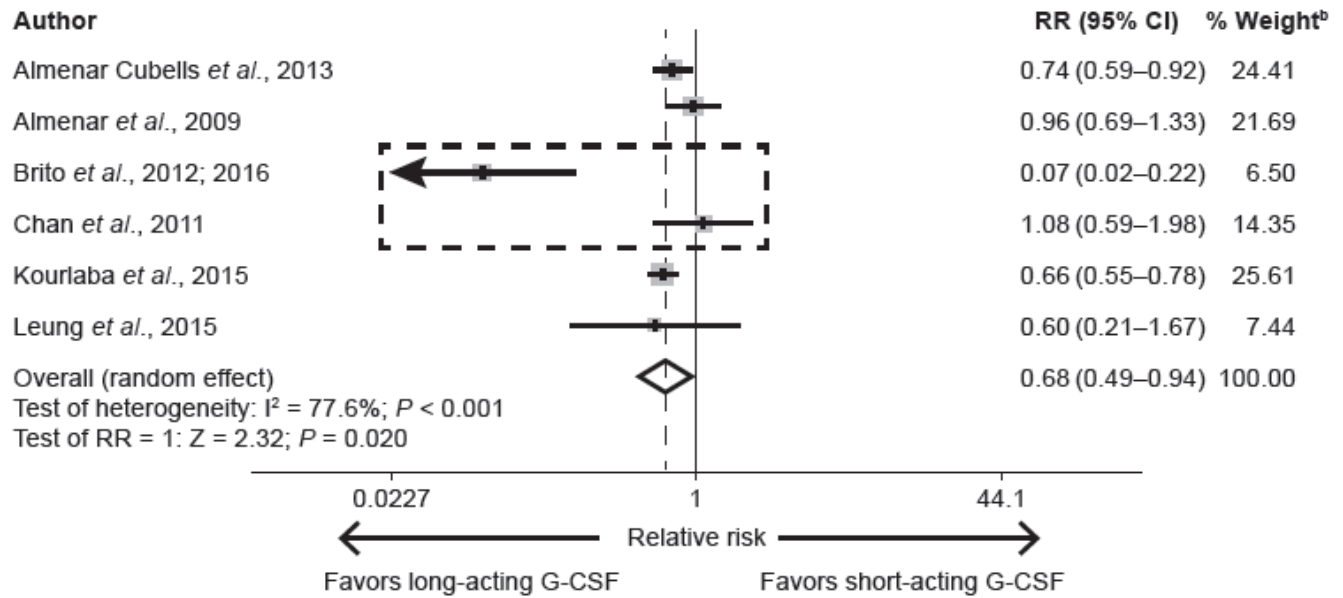

<sup>a</sup>The dotted square indicates studies in which G-CSF administration adhered to label recommendations ( $\geq 7$  days of treatment). <sup>b</sup>Weights are from random-effect analysis. *CI* confidence interval, *G-CSF* granulocyte colony-stimulating factor,  $I^2$  chi-squared, *RCT* randomized controlled trial, *RR* relative risk.
